# Supplementary material for: Visualizing the functional architecture of the endocytic machinery
Source: eLife journal article supplement (doi:10.7554/elife.04535), 2015-02-12
Supplement: supp [file elife_poa_e04535_Supplementary_File_1.xls]

## Sheet: data.csv
abp1
t (s)	t.err (s)	x (nm)	x.err (nm)	n (molecule)	n.err (molecule)
-7359	0.138	32864	15518	0	0.312
-7254	0.138	36015	10588	9548	0.867
-7.15	0.138	38133	11806	16851	1.47
-7045	0.138	38137	10473	27603	2379
-6941	0.138	38215	7905	27737	2.39
-6836	0.138	41103	7918	32522	2797
-6732	0.138	39.1	7136	36147	3107
-6627	0.138	36093	10.94	29.8	2565
-6523	0.138	40672	10629	45004	3863
-6418	0.138	44.12	9275	40902	3513
-6314	0.138	44078	8629	43.78	3758
-6209	0.138	43439	6635	51367	4407
-6105	0.138	47013	7213	56931	4883
-6	0.138	43802	6736	58895	5051
-5896	0.138	47336	6365	67021	5747
-5791	0.138	42.71	7431	69611	5969
-5687	0.138	46713	6845	76217	6535
-5582	0.138	48522	7247	90589	7766
-5478	0.138	49929	7089	96103	8239
-5373	0.138	49425	6741	100824	8644
-5269	0.138	48196	6.65	113541	9733
-5164	0.138	51768	7146	114619	9826
-5.06	0.138	52863	6613	121619	10426
-4955	0.138	53135	6626	132374	11348
-4851	0.138	55005	6438	140.39	12035
-4746	0.138	55819	6506	155193	13304
-4642	0.138	58497	6449	162.39	13921
-4537	0.138	61075	6679	166963	14313
-4433	0.138	63924	6385	177233	15194
-4328	0.138	63459	6422	176688	15147
-4224	0.138	63887	6555	190329	16317
-4119	0.138	65749	6722	208751	17896
-4015	0.138	67678	6644	210.07	18.01
-3.91	0.138	69783	6716	221751	19011
-3806	0.138	71261	6742	229555	19.68
-3701	0.138	73176	6419	234237	20082
-3597	0.138	73219	6713	240329	20604
-3492	0.138	73052	6.61	252417	21641
-3388	0.138	77327	6.46	257083	22041
-3283	0.138	78801	6723	271945	23315
-3179	0.138	79917	6528	272741	23384
-3074	0.138	80696	6696	285405	24.47
-2.97	0.138	82261	6136	295044	25296
-2865	0.138	82.5	6309	297106	25473
-2761	0.138	85611	6193	303859	26052
-2656	0.138	85642	6465	308107	26416
-2552	0.138	88214	6301	321086	27529
-2447	0.138	91702	6379	332147	28478
-2343	0.138	92.08	6368	339447	29104
-2238	0.138	93731	6484	344544	29541
-2134	0.138	94986	6.19	351186	30.11
-2029	0.138	96144	6.76	352304	30206
-1925	0.138	98126	7221	359082	30787
-1.82	0.138	99717	7.3	362816	31108
-1716	0.138	99201	7.57	369556	31686
-1611	0.138	104466	7555	375338	32181
-1507	0.138	105806	7442	376737	32301
-1402	0.138	108887	7713	386016	33097
-1298	0.138	108956	7791	387101	33.19
-1193	0.138	110933	7747	397259	34061
-1089	0.138	112701	7971	395952	33949
-0.984	0.138	113639	7989	398967	34208
-0.88	0.138	116077	7813	405377	34757
-0.775	0.138	117.37	8506	395.71	33928
-0.671	0.138	118923	8065	401426	34418
-0.566	0.138	120314	8866	400.5	34339
-0.462	0.138	125164	9.68	409311	35095
-0.357	0.138	127411	9903	419695	35985
-0.253	0.138	129831	10291	416913	35746
-0.148	0.138	133444	10294	419823	35996
-0.044	0.138	134948	10269	419446	35964
0.061	0.138	136783	10971	421201	36114
0.165	0.138	139493	11468	418375	35872
0.27	0.138	140782	11045	411548	35286
0.374	0.138	145883	11956	408932	35062
0.479	0.138	149915	12566	419064	35931
0.583	0.138	156779	13121	417195	35771
0.688	0.138	159.53	14326	423.15	36282
0.792	0.138	160313	13484	409934	35148
0.897	0.138	164.35	17531	409029	35071
1001	0.138	169691	16612	390796	33507
1106	0.138	171567	15867	388958	33.35
1.21	0.138	169374	12904	387.16	33195
1315	0.138	175288	17612	375597	32204
1419	0.138	179308	19952	366399	31415
1524	0.138	182.78	19454	362577	31087
1628	0.138	190501	20829	352915	30259
1733	0.138	183684	20.53	348344	29867
1837	0.138	195369	22195	340768	29217
1942	0.138	193739	18935	337281	28918
2046	0.138	193584	21441	331178	28395
2151	0.138	200908	22941	315492	27.05
2255	0.138	204162	23779	307.48	26363
2.36	0.138	210855	26261	298199	25567
2464	0.138	206886	25.52	298865	25624
2569	0.138	212122	29554	283119	24274
2673	0.138	215.59	27978	265283	22744
2778	0.138	221595	29479	256762	22014
2882	0.138	215715	31052	262.08	22.47
2987	0.138	224081	32709	261.73	22.44
3091	0.138	221808	28621	246814	21161
3196	0.138	224234	33264	240772	20643
3.3	0.138	221721	34001	231292	19.83
3405	0.138	213051	33261	215.8	18501
3509	0.138	210.45	33217	210001	18004
3614	0.138	226901	37917	210798	18072
3718	0.138	221127	36923	187.81	16101
3823	0.138	234631	37471	187521	16076
3927	0.138	244798	43859	170029	14576
4032	0.138	222625	41757	163501	14017
4136	0.138	255366	49964	174118	14927
4241	0.138	237003	52477	172215	14764
4345	0.138	253016	44993	135808	11642
4.45	0.138	257.77	56743	144156	12358
4554	0.138	237173	47714	161919	13881
4659	0.138	235362	49094	134365	11519
4763	0.138	255399	45306	108004	9259
4868	0.138	260813	55027	112823	9672
4972	0.138	236732	47.21	99114	8497
5077	0.138	249598	48118	130857	11218
5181	0.138	247791	53129	102503	8787
5286	0.138	252254	60622	121509	10416
5.39	0.138	290062	47803	115076	9865
5495	0.138	267581	59502	107543	9219
5599	0.138	294645	64697	118399	10.15
5704	0.138	253592	52902	95551	8192
5808	0.138	295409	68778	95465	8184
act1
t (s)	t.err (s)	x (nm)	x.err (nm)	n (molecule)	n.err (molecule)
-7067	0.152	28662	10949	0	0.242
-6963	0.152	28316	8901	6248	1179
-6858	0.152	25.31	9211	10.92	2031
-6754	0.152	25394	9271	15943	2955
-6649	0.152	26484	8234	16893	3131
-6545	0.152	29905	8542	16203	3004
-6.44	0.152	30.18	7158	29188	5.4
-6336	0.152	24803	6751	26796	4958
-6231	0.152	29151	6527	25687	4753
-6127	0.152	31654	6664	34416	6366
-6022	0.152	28984	6453	34565	6393
-5918	0.152	30662	6838	38316	7086
-5813	0.152	33908	6355	43.37	8.02
-5709	0.152	33.76	6089	45994	8505
-5604	0.152	33684	5683	50705	9376
-5.5	0.152	32485	5954	53291	9854
-5395	0.152	37532	6242	59624	11025
-5291	0.152	38191	6314	59476	10997
-5186	0.152	37534	6696	62713	11596
-5082	0.152	38791	6165	71763	13269
-4977	0.152	43243	5749	82895	15327
-4873	0.152	43148	5604	88596	16381
-4768	0.152	43433	5638	89656	16577
-4664	0.152	45298	5.69	99714	18437
-4559	0.152	45.01	5761	105433	19494
-4455	0.152	47503	5693	112703	20838
-4.35	0.152	49153	5357	119069	22015
-4246	0.152	49102	5384	122696	22686
-4141	0.152	49626	5643	126.25	23343
-4037	0.152	52892	5364	131357	24287
-3932	0.152	53021	5501	138.5	25608
-3828	0.152	57166	5497	149.7	27679
-3723	0.152	58472	5774	156304	28.9
-3619	0.152	58668	5576	164624	30438
-3514	0.152	59045	5381	167912	31046
-3.41	0.152	60545	5347	176583	32649
-3305	0.152	62973	5331	184753	34.16
-3201	0.152	64056	5335	186.54	34491
-3096	0.152	68271	5318	197326	36485
-2992	0.152	67387	5319	197663	36547
-2887	0.152	72.34	5363	208186	38493
-2783	0.152	73661	5478	214165	39598
-2678	0.152	73785	5317	216533	40036
-2574	0.152	76706	5267	222593	41157
-2469	0.152	78672	5472	226624	41902
-2365	0.152	80431	5282	229433	42421
-2.26	0.152	83.7	5455	238132	44.03
-2156	0.152	84859	5265	241216	44.6
-2051	0.152	87435	5466	242678	44.87
-1947	0.152	89341	5409	249328	46.1
-1842	0.152	92379	5662	254182	46997
-1738	0.152	94843	5647	254642	47082
-1633	0.152	93628	5.55	256819	47485
-1529	0.152	97293	5681	263.59	48737
-1424	0.152	99155	5876	265.24	49042
-1.32	0.152	101632	5703	270448	50005
-1215	0.152	105019	5883	265204	49036
-1111	0.152	106409	6333	263444	48.71
-1006	0.152	109189	6097	266306	49239
-0.902	0.152	110938	6377	268932	49725
-0.797	0.152	112727	6231	267769	49.51
-0.693	0.152	116661	6807	262.97	48622
-0.588	0.152	117632	7127	266732	49318
-0.484	0.152	119991	7868	266335	49245
-0.379	0.152	121184	7799	263054	48638
-0.275	0.152	122112	8711	261955	48435
-0.17	0.152	125312	9702	264909	48981
-0.066	0.152	124994	9932	267575	49474
0.039	0.152	125974	10151	265743	49135
0.143	0.152	129444	9984	265.15	49025
0.248	0.152	128461	9.61	265054	49008
0.352	0.152	131131	12453	265962	49176
0.457	0.152	130908	12301	259655	48.01
0.561	0.152	130727	12.51	252954	46.77
0.666	0.152	129896	10843	250059	46235
0.77	0.152	140437	15954	256517	47429
0.875	0.152	144651	17237	246147	45512
0.979	0.152	146342	17669	251.4	46483
1084	0.152	150103	18231	243799	45078
1188	0.152	152257	20.19	244372	45184
1293	0.152	160922	22336	247841	45825
1397	0.152	151726	17131	240823	44527
1502	0.152	158966	25208	238567	44.11
1606	0.152	147954	17112	233968	43.26
1711	0.152	163252	28381	220321	40737
1815	0.152	171575	30884	217401	40197
1.92	0.152	166515	30543	205795	38051
2024	0.152	166843	28961	218947	40483
2129	0.152	163387	30307	205638	38022
2233	0.152	176042	33505	191852	35473
2338	0.152	179751	32372	198626	36725
2442	0.152	180343	35179	188798	34908
2547	0.152	189622	37855	176918	32711
2651	0.152	165958	23637	183208	33874
2756	0.152	194191	37224	171462	31703
2.86	0.152	193451	33665	163656	30259
2965	0.152	194759	41399	158786	29359
3069	0.152	190242	42422	158606	29326
3174	0.152	198166	39225	147898	27346
3278	0.152	208853	50244	156467	28.93
3383	0.152	209163	53741	159226	29.44
3487	0.152	200.91	60.77	144778	26769
3592	0.152	213025	47448	141718	26203
3696	0.152	246617	58063	135286	25014
3801	0.152	239111	63075	137307	25387
3905	0.152	236352	48145	125797	23259
4.01	0.152	238909	54515	116.14	21474
4114	0.152	234365	50403	117092	21.65
4219	0.152	248183	60696	127458	23566
4323	0.152	274256	64661	121.84	22528
4428	0.152	279925	54526	103651	19164
4532	0.152	288836	64936	116713	21.58
4637	0.152	287732	58679	115541	21363
4741	0.152	283988	65295	99314	18363
4846	0.152	281641	66273	94425	17459
4.95	0.152	243183	76327	91345	16889
5055	0.152	247316	41768	74811	13833
5159	0.152	266.94	81485	60844	11251
5264	0.152	259.18	79261	79446	14689
arc18
t (s)	t.err (s)	x (nm)	x.err (nm)	n (molecule)	n.err (molecule)
-7787	0.163	31627	14399	0	0.312
-7682	0.163	34275	9288	8138	2113
-7578	0.163	35919	11646	7719	2006
-7473	0.163	33294	13307	16653	4291
-7369	0.163	35933	9007	9.21	2386
-7264	0.163	36.16	10052	12496	3225
-7.16	0.163	33171	10463	10964	2834
-7055	0.163	35.37	10714	9522	2465
-6951	0.163	33923	8765	17468	4.5
-6846	0.163	36447	7129	17511	4511
-6742	0.163	38281	8466	26425	6.8
-6637	0.163	39808	7913	23662	6.09
-6533	0.163	38973	7339	22887	5891
-6428	0.163	38328	9126	24685	6353
-6324	0.163	37592	7152	35966	9251
-6219	0.163	37.26	7037	33.49	8615
-6115	0.163	43.07	6791	36964	9508
-6.01	0.163	41.11	8452	34214	8801
-5906	0.163	47181	5922	44309	11396
-5801	0.163	45316	7054	43069	11077
-5697	0.163	44862	6085	57575	14806
-5592	0.163	44045	6431	53821	13841
-5488	0.163	44499	6219	61.47	15807
-5383	0.163	48353	6578	63.22	16257
-5279	0.163	49984	6047	68817	17696
-5174	0.163	50172	5834	73.11	18.8
-5.07	0.163	46309	6571	72459	18633
-4965	0.163	48.57	6076	75.36	19379
-4861	0.163	50.66	6375	82958	21332
-4756	0.163	52095	5722	89014	22889
-4652	0.163	54541	6055	92706	23839
-4547	0.163	55.43	5948	91406	23505
-4443	0.163	55914	5685	97.57	25089
-4338	0.163	53921	6044	99181	25504
-4234	0.163	59034	6126	105584	27.15
-4129	0.163	58915	5483	104477	26866
-4025	0.163	57818	5521	106723	27443
-3.92	0.163	58299	5989	115.7	29751
-3816	0.163	62376	5778	123104	31655
-3711	0.163	66605	5.56	127675	32831
-3607	0.163	64804	5831	133918	34436
-3502	0.163	67.19	5975	136135	35006
-3398	0.163	68856	5542	143078	36792
-3293	0.163	69492	5704	151309	38908
-3189	0.163	73446	5.57	154928	39839
-3084	0.163	73864	5394	160607	41299
-2.98	0.163	74767	5.85	160309	41222
-2875	0.163	79208	5588	166753	42879
-2771	0.163	79848	5283	167239	43004
-2666	0.163	82678	5636	174.63	44905
-2562	0.163	84238	5326	175641	45165
-2457	0.163	85449	5211	180299	46363
-2353	0.163	89629	5732	189434	48712
-2248	0.163	87562	5112	187286	48.16
-2144	0.163	91359	5388	186172	47873
-2039	0.163	91867	5324	195.22	50.2
-1935	0.163	94174	5.17	203007	52202
-1.83	0.163	95659	5243	200137	51464
-1726	0.163	101279	5179	203699	52.38
-1621	0.163	100676	5939	204297	52534
-1517	0.163	97056	5734	205821	52926
-1412	0.163	101231	5921	204549	52598
-1308	0.163	106.25	5999	207333	53315
-1203	0.163	108.89	5843	207768	53426
-1099	0.163	107215	6441	209277	53814
-0.994	0.163	107523	6219	211.43	54368
-0.89	0.163	110653	7075	205076	52734
-0.785	0.163	113369	6409	205941	52957
-0.681	0.163	113639	7278	205708	52897
-0.576	0.163	114299	7704	209951	53988
-0.472	0.163	116.23	7937	211753	54451
-0.367	0.163	116128	8686	207.33	53314
-0.263	0.163	119465	8138	207806	53436
-0.158	0.163	123566	8523	207966	53477
-0.054	0.163	123155	7929	207.54	53368
0.051	0.163	122882	8908	201711	51869
0.155	0.163	126193	9567	207479	53352
0.26	0.163	125936	8648	208536	53624
0.364	0.163	128234	10995	200992	51684
0.469	0.163	127.68	10594	195408	50248
0.573	0.163	133708	10317	194.47	50007
0.678	0.163	130294	11445	193625	49789
0.782	0.163	134607	12445	191947	49358
0.887	0.163	140645	11995	186046	47841
0.991	0.163	140098	15799	183474	47179
1096	0.163	140222	16655	179134	46063
1.2	0.163	142.46	16864	181523	46677
1305	0.163	152919	15103	174697	44922
1409	0.163	148413	15695	176507	45388
1514	0.163	152244	16963	167072	42962
1618	0.163	150359	16682	159731	41074
1723	0.163	154269	16339	153369	39438
1827	0.163	155658	17344	153175	39388
1932	0.163	158315	17209	152429	39196
2036	0.163	160425	18634	144.49	37155
2141	0.163	157434	19479	142.13	36548
2245	0.163	154771	21638	133974	34.45
2.35	0.163	165296	19645	132097	33968
2454	0.163	170837	23448	132459	34061
2559	0.163	174908	23823	127303	32735
2663	0.163	165405	26951	126145	32437
2768	0.163	180925	24654	121898	31345
2872	0.163	166464	25687	110.09	28309
2977	0.163	169807	23056	104777	26943
3081	0.163	167766	29104	100723	25.9
3186	0.163	188085	29811	101.06	25987
3.29	0.163	189831	30572	94.87	24395
3395	0.163	185933	29366	89827	23099
3499	0.163	172648	30524	87854	22591
3604	0.163	186401	35863	85564	22003
3708	0.163	177932	31889	85102	21884
3813	0.163	174541	32003	82481	21.21
3917	0.163	182469	30569	67642	17394
4022	0.163	180152	38799	62.28	16016
4126	0.163	181127	37222	68215	17542
4231	0.163	177654	36375	52.39	13473
4335	0.163	179207	38884	48633	12507
4.44	0.163	193.43	44501	38737	9964
4544	0.163	181449	45735	55035	14153
4649	0.163	198199	48497	51546	13256
4753	0.163	181281	50066	53139	13666
4858	0.163	172821	49745	41728	10732
4962	0.163	185334	50252	42333	10888
5067	0.163	195235	54094	48558	12488
5171	0.163	166819	45858	41919	10782
5276	0.163	175317	47664	37565	9663
5.38	0.163	155227	60308	40843	10506
5485	0.163	177667	46807	29839	7677
5589	0.163	174103	61116	42.68	10978
5694	0.163	157.23	50747	23592	6074
5798	0.163	146.78	53498	33028	8497
end3
t (s)	t.err (s)	x (nm)	x.err (nm)	n (molecule)	n.err (molecule)
-23947	0.74	24444	12447	3529	0.62
-23842	0.74	33.98	13412	5605	0.772
-23737	0.74	26312	11639	2227	0.566
-23633	0.74	29213	12256	1888	0.559
-23529	0.74	28158	12081	4926	0.753
-23424	0.74	22721	13.42	8155	0.989
-23319	0.74	36019	11819	4579	0.703
-23215	0.74	23023	13985	4314	0.674
-23.11	0.74	28616	11.91	5742	0.802
-23006	0.74	21205	13.99	2247	0.593
-22901	0.74	27468	12287	3799	0.645
-22797	0.74	23038	12.45	1845	0.551
-22692	0.74	25597	14072	2653	0.586
-22588	0.74	31168	11888	7058	0.891
-22483	0.74	35366	12.8	5195	0.736
-22379	0.74	25772	13516	7682	0.946
-22274	0.74	27783	11731	7.8	0.951
-22.17	0.74	28153	11705	8384	1006
-22066	0.74	26424	12003	11636	1306
-21961	0.74	25067	11765	10187	1167
-21856	0.74	24.54	12561	8504	1018
-21752	0.74	22545	10681	8536	1015
-21648	0.74	24278	12319	5394	0.752
-21543	0.74	24192	10571	8745	1032
-21438	0.74	22866	11778	9565	1108
-21334	0.74	23867	10795	11116	1249
-21.23	0.74	25.38	12001	10.57	1209
-21125	0.74	24272	10.74	12742	1416
-21.02	0.74	22143	10.77	8607	1028
-20916	0.74	31177	11336	11325	1276
-20811	0.74	30.74	10861	10023	1149
-20707	0.74	24081	11108	6323	0.818
-20602	0.74	28585	10789	5569	0.759
-20498	0.74	21117	11448	10598	1207
-20393	0.74	23827	10179	11843	1322
-20289	0.74	24046	11256	10536	1197
-20184	0.74	25147	10232	10951	1.23
-20.08	0.74	28861	11152	10363	1176
-19975	0.74	23125	11.31	6854	0.86
-19871	0.74	22214	11114	12975	1428
-19767	0.74	19127	12737	9071	1056
-19662	0.74	22361	10987	11654	1302
-19557	0.74	18681	11239	11402	1279
-19453	0.74	22297	12083	16412	1771
-19349	0.74	25239	10862	13.32	1464
-19244	0.74	19875	11251	14097	1539
-19139	0.74	21151	11108	16264	1755
-19035	0.74	21591	10578	16838	1812
-18931	0.74	19073	11499	13.74	1504
-18826	0.74	22028	10.61	16214	1746
-18721	0.74	23447	10362	13485	1478
-18617	0.74	21364	10749	18776	2005
-18512	0.74	23778	11051	15645	1693
-18408	0.74	25674	11134	18041	1933
-18303	0.74	27435	10.99	17421	1869
-18199	0.74	22133	11422	22268	2361
-18094	0.74	23693	10386	21595	2294
-17.99	0.74	20897	11085	20038	2138
-17886	0.74	22424	10824	20504	2184
-17781	0.74	21999	11239	21.45	2281
-17676	0.74	27707	11232	19999	2133
-17572	0.74	19728	10037	18231	1954
-17468	0.74	20822	10143	16.95	1824
-17363	0.74	24168	10942	20295	2159
-17258	0.74	22167	10341	19483	2078
-17154	0.74	26346	10755	22914	2428
-17.05	0.74	26332	11334	21196	2255
-16945	0.74	24557	10982	22.77	2415
-16.84	0.74	23357	10484	23278	2465
-16736	0.74	25371	10324	26165	2761
-16632	0.74	26764	10043	23957	2535
-16527	0.74	22213	10703	22227	2359
-16422	0.74	24514	10891	25044	2646
-16318	0.74	26846	10696	27436	2889
-16213	0.74	24441	10.97	24046	2541
-16109	0.74	25358	10798	29425	3093
-16005	0.74	23385	11524	24091	2546
-15.9	0.74	22181	10629	27358	2883
-15795	0.74	25823	9909	23918	2.53
-15691	0.74	25123	11107	27493	2897
-15586	0.74	23147	10431	26747	2818
-15482	0.74	22924	10805	27353	2.88
-15377	0.74	24582	10557	30093	3161
-15273	0.74	25202	10253	29205	3.07
-15168	0.74	28297	9691	33615	3525
-15064	0.74	23492	10596	34754	3641
-14.96	0.74	27613	9739	35963	3767
-14855	0.74	25514	9871	33163	3478
-14751	0.74	25668	9989	32227	3382
-14646	0.74	18607	10086	33.9	3553
-14542	0.74	19035	10018	32418	3.4
-14437	0.74	20234	10078	33722	3535
-14332	0.74	22846	9762	32766	3436
-14228	0.74	22646	9.87	34591	3625
-14124	0.74	23244	9903	32824	3443
-14019	0.74	24865	9.36	32321	3391
-13914	0.74	21.23	9846	30611	3213
-13.81	0.74	22776	9617	32884	3447
-13706	0.74	27688	9755	34999	3666
-13601	0.74	24581	9841	34384	3603
-13496	0.74	23733	10.04	38138	3.99
-13392	0.74	24834	9446	34643	3629
-13287	0.74	26047	9356	35323	3699
-13183	0.74	26513	9697	39404	4121
-13079	0.74	22416	9542	38263	4003
-12974	0.74	21777	9394	37193	3893
-12.87	0.74	25.06	9822	37956	3972
-12765	0.74	23592	9706	37.61	3936
-12661	0.74	25194	9.69	36562	3827
-12556	0.74	25273	9419	38139	3989
-12452	0.74	27971	9312	38046	3981
-12347	0.74	27968	9425	38345	4012
-12243	0.74	27497	9536	39276	4108
-12138	0.74	25782	9418	39024	4082
-12033	0.74	28302	9565	38911	4071
-11929	0.74	25169	9606	39856	4168
-11825	0.74	26451	9.34	36157	3785
-11.72	0.74	25888	9338	39543	4135
-11615	0.74	24355	9556	41.21	4307
-11511	0.74	23121	9547	38653	4043
-11407	0.74	24243	9.59	42777	4.47
-11302	0.74	24111	9393	45564	4759
-11197	0.74	25526	9653	41018	4288
-11093	0.74	24.98	9602	44606	4659
-10989	0.74	24.59	9294	42837	4476
-10884	0.74	26.13	9669	45353	4737
-10.78	0.74	23779	9.42	45.75	4777
-10675	0.74	25052	9541	43744	4.57
-10571	0.74	25861	9551	45807	4784
-10466	0.74	25571	9482	43813	4577
-10362	0.74	25559	9362	45065	4706
-10257	0.74	22733	9338	46931	4.9
-10153	0.74	24785	9401	46.74	4.88
-10048	0.74	24531	9521	50722	5293
-9944	0.74	23737	9704	49357	5152
-9839	0.74	26.05	9476	49927	5211
-9734	0.74	24882	9487	46454	4.85
-9.63	0.74	25636	9688	45849	4788
-9526	0.74	26646	9.38	43865	4582
-9421	0.74	26933	9845	49161	5131
-9316	0.74	24.31	9545	48529	5066
-9212	0.74	25587	9435	50658	5286
-9108	0.74	26256	9456	49315	5147
-9003	0.74	23163	9466	48759	5089
-8899	0.74	25761	9388	50374	5257
-8794	0.74	25045	9553	52.71	5499
-8.69	0.74	25431	9466	50204	5239
-8585	0.74	26479	9578	51772	5402
-8481	0.74	26114	9601	53046	5534
-8376	0.74	27302	9605	51693	5394
-8272	0.74	29092	9374	51236	5346
-8167	0.74	25797	9428	51803	5405
-8063	0.74	25602	9646	52549	5482
-7958	0.74	26714	9426	53444	5575
-7854	0.74	27748	9343	51259	5349
-7749	0.74	25386	9467	51343	5357
-7645	0.74	28407	9487	53768	5609
-7.54	0.74	24341	9435	55271	5765
-7436	0.74	27.66	9377	53824	5615
-7331	0.74	28307	9491	53656	5597
-7226	0.74	29101	9375	55069	5744
-7122	0.74	28056	9.52	53367	5567
-7018	0.74	29699	9458	53706	5602
-6913	0.74	29825	9419	56169	5858
-6809	0.74	29527	9434	56599	5903
-6704	0.74	28319	9302	57488	5995
-6.6	0.74	30264	9437	55019	5739
-6495	0.74	29859	9387	53651	5597
-6391	0.74	30362	9369	53062	5536
-6286	0.74	30937	9438	56794	5923
-6182	0.74	32404	9654	57366	5982
-6077	0.74	30442	9.35	59724	6227
-5973	0.74	30485	9637	60063	6263
-5868	0.74	31775	9474	58427	6092
-5764	0.74	34294	9638	56647	5908
-5659	0.74	32159	9587	54.47	5682
-5555	0.74	33566	9585	56451	5887
-5.45	0.74	36586	9.68	59098	6162
-5346	0.74	34929	9.71	58.5	6.1
-5241	0.74	36373	10134	59269	6.18
-5137	0.74	37431	9584	57882	6036
-5032	0.74	35699	9685	57202	5966
-4928	0.74	39859	9626	55073	5744
-4823	0.74	41082	9845	53137	5544
-4719	0.74	41133	9781	54279	5662
-4614	0.74	42371	9672	54647	5701
-4.51	0.74	42338	10078	55.08	5745
-4405	0.74	48843	10065	52801	5509
-4301	0.74	46109	9781	51347	5358
-4196	0.74	50675	9859	52126	5439
-4092	0.74	49689	9971	53043	5534
-3987	0.74	52012	10219	49159	5131
-3883	0.74	51.93	10377	49722	5.19
-3778	0.74	55423	10226	52048	5431
-3674	0.74	59324	10428	47679	4978
-3569	0.74	63082	9888	49977	5217
-3465	0.74	66454	10.16	47649	4975
-3.36	0.74	67.44	10631	47525	4963
-3256	0.74	70341	10488	43732	4.57
-3151	0.74	75037	10296	46598	4867
-3047	0.74	76577	9832	48629	5077
-2942	0.74	76816	10477	44334	4631
-2838	0.74	81329	10247	49115	5127
-2733	0.74	84714	10395	46866	4895
-2629	0.74	87443	10321	46851	4893
-2524	0.74	88.63	10475	41311	4.32
-2.42	0.74	97157	10317	42927	4487
-2315	0.74	97385	10616	40783	4264
-2211	0.74	100597	11092	40138	4197
-2106	0.74	102199	10526	36139	3785
-2002	0.74	104913	10747	38.73	4052
-1897	0.74	106788	10713	38644	4044
-1793	0.74	110888	11451	37255	3.9
-1688	0.74	117977	11053	34564	3622
-1584	0.74	120.29	11164	33528	3516
-1479	0.74	120941	11393	30051	3157
-1375	0.74	125739	10393	30118	3166
-1.27	0.74	126872	10.9	33655	3531
-1166	0.74	129.51	11232	32374	3398
-1061	0.74	132677	12002	27516	2898
-0.957	0.74	131899	12399	24637	2603
-0.852	0.74	135342	12.14	25377	2678
-0.748	0.74	136919	11785	26598	2804
-0.643	0.74	139523	11978	25628	2705
-0.539	0.74	147552	12497	17776	1908
-0.434	0.74	149943	12935	16754	1806
-0.33	0.74	155176	14.41	16497	1781
-0.225	0.74	149841	13462	13917	1523
-0.121	0.74	157.18	14721	11087	1249
-0.016	0.74	156944	12949	14411	1575
0.088	0.74	159699	13285	9559	1103
0.193	0.74	166.9	15169	11102	1252
0.297	0.74	166192	16931	9068	1065
0.402	0.74	165947	15326	10345	1183
0.506	0.74	173596	13.63	8949	1064
0.611	0.74	172166	15517	10358	1196
0.715	0.74	178755	15348	5905	0.791
0.82	0.74	178344	15.29	6298	0.824
0.924	0.74	182903	18938	0	0.497
1029	0.74	174263	20037	2743	0.583
1133	0.74	175135	22724	7423	0.941
1238	0.74	182558	24773	5344	0.774
gfp_sla2
t (s)	t.err (s)	x (nm)	x.err (nm)	n (molecule)	n.err (molecule)
-22627	0.252	-2149	9184	8797	1272
-22502	0.252	-1833	10583	15929	1742
-22377	0.252	-1943	7825	7722	1165
-22252	0.252	5581	8537	8226	1183
-22127	0.252	6111	7407	11741	1426
-22002	0.252	5591	8435	11411	1426
-21877	0.252	5341	9.34	9524	1284
-21752	0.252	9204	10601	9901	1291
-21627	0.252	7639	8593	17402	1865
-21502	0.252	4651	8305	15994	1738
-21377	0.252	12.64	9055	14167	1632
-21252	0.252	6937	7986	9851	1263
-21127	0.252	-0.911	7637	9.37	1266
-21002	0.252	1817	8018	10.25	1325
-20877	0.252	3468	8596	12022	1465
-20752	0.252	1559	7967	15436	1701
-20627	0.252	0.031	7719	9266	1245
-20502	0.252	1483	7825	13842	1.55
-20377	0.252	3.76	8.42	15323	1659
-20252	0.252	2.25	8307	13325	1509
-20127	0.252	3505	7072	12978	1488
-20002	0.252	0.937	7504	17.9	1859
-19877	0.252	-0.222	7705	13743	1528
-19752	0.252	2343	7229	14227	1572
-19627	0.252	5659	8765	18165	1883
-19502	0.252	7158	7528	14209	1576
-19377	0.252	-1.58	8819	20931	2109
-19252	0.252	-0.642	8092	21584	2161
-19127	0.252	9309	9234	22188	2216
-19002	0.252	1152	6768	17126	1789
-18877	0.252	-0.917	10242	18427	1898
-18752	0.252	-0.497	7138	19591	1988
-18627	0.252	4087	8284	21481	2169
-18502	0.252	-4196	9423	20738	2096
-18377	0.252	2465	9387	20.13	2046
-18252	0.252	3838	8544	17241	1809
-18127	0.252	0.893	8328	21425	2141
-18002	0.252	1418	7942	18914	1931
-17877	0.252	1135	7712	27643	2666
-17752	0.252	-0.799	7674	20127	2036
-17627	0.252	-1238	7481	19551	1.99
-17502	0.252	-0.072	8156	21932	2181
-17377	0.252	1153	7784	22673	2248
-17252	0.252	4257	7994	20922	2.1
-17127	0.252	-1.29	7149	22036	2.19
-17002	0.252	3959	7.89	23901	2.35
-16877	0.252	0.73	8221	19523	1985
-16752	0.252	1756	6285	26978	2614
-16627	0.252	3609	8127	25518	2484
-16502	0.252	3226	7289	23375	2301
-16377	0.252	1.69	7352	23663	2324
-16252	0.252	-1311	7741	23433	2308
-16127	0.252	1693	7578	23928	2.35
-16002	0.252	2934	7587	21834	2166
-15877	0.252	-1.68	7409	21045	2099
-15752	0.252	-3325	7248	21029	2097
-15627	0.252	3606	6715	24121	2359
-15502	0.252	5395	7.88	24225	2367
-15377	0.252	2275	8115	24417	2385
-15252	0.252	1531	6444	22069	2186
-15127	0.252	0.148	7373	22974	2263
-15002	0.252	2.24	8018	26107	2531
-14877	0.252	2964	6951	25392	2465
-14752	0.252	-0.551	7361	28722	2757
-14627	0.252	2898	8.66	32179	3061
-14502	0.252	-4982	7219	21728	2156
-14377	0.252	-1.03	7434	24475	2387
-14252	0.252	-0.385	7841	25626	2487
-14127	0.252	-2215	8507	22173	2189
-14002	0.252	0.441	7.21	25087	2438
-13877	0.252	0.647	6906	24911	2423
-13752	0.252	0.378	6872	25441	2471
-13627	0.252	-0.445	6424	26742	2.58
-13502	0.252	1271	6422	32094	3053
-13377	0.252	5.35	6294	24282	2368
-13252	0.252	3044	6975	27582	2653
-13127	0.252	2227	7491	28679	2.75
-13002	0.252	3084	6733	29536	2825
-12877	0.252	0.713	7.06	26547	2566
-12752	0.252	2.92	6377	30129	2879
-12627	0.252	3042	6798	24734	2408
-12502	0.252	2927	6332	28742	2755
-12377	0.252	5117	7.01	28257	2712
-12252	0.252	3229	6952	28369	2723
-12127	0.252	1034	6877	27594	2656
-12002	0.252	0.197	6849	29941	2859
-11877	0.252	4733	6784	32.5	3086
-11752	0.252	2546	6893	29448	2815
-11627	0.252	1384	6.34	30509	2908
-11502	0.252	2827	6188	33481	3173
-11377	0.252	-0.119	6186	30023	2867
-11252	0.252	3204	6161	34138	3229
-11127	0.252	2991	6169	33217	3151
-11002	0.252	0.812	5957	32512	3088
-10877	0.252	3159	6281	43123	4035
-10752	0.252	4.14	7391	37817	3562
-10627	0.252	1624	6954	33382	3165
-10502	0.252	-0.37	6402	35296	3335
-10377	0.252	2329	6288	36.5	3443
-10252	0.252	0.042	6002	37241	3507
-10127	0.252	3641	6557	38313	3603
-10002	0.252	1434	6036	34722	3283
-9877	0.252	3962	5.84	37672	3546
-9752	0.252	2983	7685	39053	3668
-9627	0.252	1347	6109	39174	3.68
-9502	0.252	4692	6281	40818	3828
-9377	0.252	5336	6792	42311	3963
-9252	0.252	4777	6788	41.62	3901
-9127	0.252	3882	6724	40224	3775
-9002	0.252	3952	6485	42346	3966
-8877	0.252	6859	6301	40486	3799
-8752	0.252	3267	6148	43901	4105
-8627	0.252	5924	6277	41467	3886
-8502	0.252	3448	6246	39187	3684
-8377	0.252	6517	8009	40052	3759
-8252	0.252	2664	6345	42747	4002
-8127	0.252	6304	6594	42148	3947
-8002	0.252	3452	6234	46229	4316
-7877	0.252	9589	6344	41461	3887
-7752	0.252	7122	7091	42702	3999
-7627	0.252	7429	6309	45062	4211
-7502	0.252	9778	6761	38361	3608
-7377	0.252	8621	6.59	37555	3534
-7252	0.252	12101	6537	40571	3805
-7127	0.252	12995	7209	45502	4249
-7002	0.252	9584	6897	44776	4183
-6877	0.252	12895	6554	41562	3893
-6752	0.252	9042	6664	42212	3953
-6627	0.252	15.78	6826	42797	4005
-6502	0.252	16199	7166	41043	3847
-6377	0.252	17242	6251	43423	4062
-6252	0.252	20313	7255	43.68	4084
-6127	0.252	25.04	6801	40583	3806
-6002	0.252	23998	7143	40101	3763
-5877	0.252	24034	7571	43509	4.07
-5752	0.252	24586	7117	43096	4032
-5627	0.252	27297	7145	41613	3.9
-5502	0.252	27111	7.32	41535	3892
-5377	0.252	28097	7469	43877	4103
-5252	0.252	36404	13094	42311	3961
-5127	0.252	35285	7138	44602	4168
-5002	0.252	38087	6.61	46008	4296
-4877	0.252	38166	6617	40962	3841
-4752	0.252	42173	7145	41428	3883
-4627	0.252	40494	6.68	41129	3857
-4502	0.252	44413	7845	43676	4085
-4377	0.252	48576	8382	42624	3991
-4252	0.252	48675	7678	45.37	4237
-4127	0.252	54059	8148	44.07	4121
-4002	0.252	54548	8027	42147	3948
-3877	0.252	59939	8.6	41416	3884
-3752	0.252	61047	7794	43.14	4038
-3627	0.252	66642	7771	42691	4
-3502	0.252	65771	8878	40804	3829
-3377	0.252	72102	8413	41495	3891
-3252	0.252	75212	8925	41364	3879
-3127	0.252	77741	8603	46295	4323
-3002	0.252	83949	9008	43796	4095
-2877	0.252	86265	9665	46.2	4314
-2752	0.252	82.32	9457	44644	4173
-2627	0.252	88811	8587	46588	4.35
-2502	0.252	95.03	8647	43964	4112
-2377	0.252	94233	8617	46981	4386
-2252	0.252	99317	8992	47353	4418
-2127	0.252	101714	9.15	44991	4205
-2002	0.252	102336	9054	43711	4089
-1877	0.252	109224	8806	44997	4204
-1752	0.252	109319	9666	45919	4287
-1627	0.252	119203	9805	41822	3918
-1502	0.252	121384	10976	42899	4017
-1377	0.252	127034	11336	41914	3927
-1252	0.252	131873	11391	43763	4094
-1127	0.252	135054	10671	42567	3988
-1002	0.252	136.28	9267	38187	3596
-0.877	0.252	139461	10948	40005	3759
-0.752	0.252	137996	11953	35821	3389
-0.627	0.252	143829	10831	36785	3471
-0.502	0.252	147229	13099	30587	2921
-0.377	0.252	153602	11875	33174	3151
-0.252	0.252	152778	10688	37688	3553
-0.127	0.252	157207	12778	36332	3432
-0.002	0.252	165593	11778	30732	2939
0.123	0.252	163.74	13754	32799	3118
0.248	0.252	166978	14479	30768	2941
0.373	0.252	165917	16319	31.23	2986
0.498	0.252	168693	13702	26735	2589
0.623	0.252	173397	14863	25.73	2501
0.748	0.252	182737	18574	28.56	2747
0.873	0.252	176619	14943	25.88	2516
0.998	0.252	181341	14715	26177	2534
1123	0.252	189334	18254	33105	3145
1248	0.252	182598	19039	24684	2412
1373	0.252	184.22	19167	21591	2156
1498	0.252	190127	21409	22374	2213
1623	0.252	194018	22.94	15263	1637
1748	0.252	200454	23981	19287	1961
1873	0.252	191623	24122	18213	1878
1998	0.252	200103	22079	14.08	1546
2123	0.252	192232	26997	13423	1507
2248	0.252	205451	26528	15.44	1.67
2373	0.252	202302	28486	13335	1523
2498	0.252	223264	28447	14124	1569
2623	0.252	203265	27.32	10102	1291
2748	0.252	232866	28506	16241	1735
2873	0.252	241086	26106	12617	1455
2998	0.252	234176	25528	6545	1081
3123	0.252	233513	26379	2841	0.965
3248	0.252	222375	27536	7559	1135
3373	0.252	250624	27543	0.029	0.922
3498	0.252	239398	33191	1.46	0.941
3623	0.252	238251	37089	0	0.951
las17
t (s)	t.err (s)	x (nm)	x.err (nm)	n (molecule)	n.err (molecule)
-17876	0.038	7011	21668	11174	0.951
-17617	0.037	12206	22081	11872	1.01
-17.35	0.038	11269	22385	11941	1016
-17079	0.038	13539	20.84	12179	1035
-16814	0.038	19928	21252	11905	1012
-16546	0.036	15197	21314	13744	1166
-16274	0.036	16677	19235	12511	1063
-15996	0.035	22.81	20494	11899	1011
-15738	0.034	22707	17602	14739	1.25
-15476	0.034	18096	17685	14144	1.2
-15206	0.034	20501	17219	16143	1369
-14945	0.034	20136	18331	17.42	1477
-14.68	0.033	24.11	18112	13231	1123
-14.41	0.031	22334	18496	13927	1181
-14142	0.03	20294	18621	16893	1432
-13886	0.029	26242	16.05	15091	1.28
-13614	0.029	25314	15671	13235	1123
-13345	0.029	23515	16146	16939	1436
-13083	0.029	26824	16443	15777	1337
-12817	0.029	23.55	16.55	18997	1609
-12548	0.028	27495	15217	20369	1725
-12287	0.027	25946	15664	21854	1851
-12024	0.027	22636	14129	20547	1.74
-11754	0.027	24.05	14403	20055	1699
-11489	0.027	21312	15468	23716	2008
-11228	0.026	19601	15134	24875	2106
-10958	0.027	19736	14384	21536	1824
-10693	0.026	28.34	14422	25336	2145
-10432	0.025	22084	13439	23988	2031
-10163	0.025	20074	13942	26137	2212
-9896	0.025	21277	13.53	23889	2022
-9634	0.025	24321	14012	26559	2248
-9.37	0.024	26751	13934	25.87	2.19
-9101	0.025	21513	13.44	26023	2203
-8836	0.024	22644	13722	30327	2567
-8572	0.024	24765	13038	31.13	2635
-8304	0.024	21225	12825	31089	2631
-8039	0.023	23973	12547	31494	2666
-7776	0.023	21558	12733	33832	2863
-7507	0.024	23297	11878	35952	3042
-7242	0.023	26253	14923	35015	2963
-6979	0.023	27.26	12323	36.95	3127
-6.71	0.024	24108	13765	38502	3258
-6447	0.023	26.04	13175	39721	3361
-6182	0.023	31425	11211	40332	3413
-5913	0.024	28101	12595	39.64	3354
-5648	0.023	31603	13964	38464	3255
-5.38	0.023	31347	13096	40325	3412
-5111	0.023	31834	12051	38781	3282
-4849	0.023	29568	12893	40995	3469
-4582	0.023	33932	11167	42916	3632
-4314	0.023	34078	11628	40386	3418
-4051	0.023	36127	11573	43672	3696
-3785	0.023	36484	11591	42416	3589
-3.52	0.023	40056	13.01	42538	3.6
-3255	0.023	47926	9344	43.37	3.67
-2987	0.023	43422	11369	43451	3677
-2721	0.023	45.63	11272	41322	3497
-2458	0.023	48849	10336	42801	3622
-2189	0.023	48.52	10308	42.06	3559
-1924	0.023	56778	9037	46398	3926
-1661	0.023	54699	10539	40.83	3455
-1392	0.023	52244	9465	40067	3391
-1127	0.023	53.73	9374	38513	3259
-0.864	0.023	52827	10699	36844	3118
-0.595	0.023	52.09	10214	33277	2816
-0.33	0.023	59273	13064	29775	2.52
-0.071	0.023	57826	11409	29845	2526
0.198	0.024	61.34	13064	23967	2029
0.462	0.024	68511	10.94	22796	1.93
0.725	0.024	61969	13737	14171	1202
0.989	0.024	65943	14865	17126	1451
1255	0.024	65459	12163	15018	1273
1522	0.025	66685	15625	7117	0.609
1797	0.027	67451	18834	7804	0.666
2057	0.027	73958	17845	0.881	0.125
2319	0.029	73319	21144	0	0.102
2583	0.031	68164	22364	1571	0.169
myo5
t (s)	t.err (s)	x (nm)	x.err (nm)	n (molecule)	n.err (molecule)
-7162	0.029	39945	23285	0	0.058
-6.89	0.027	31185	17085	8.79	0.766
-6623	0.026	43405	17986	11605	1.01
-6348	0.024	33924	17775	15732	1368
-6078	0.023	36723	16426	24313	2114
-5804	0.023	32964	14944	31255	2718
-5535	0.023	25502	11685	45048	3917
-5261	0.022	32066	11179	55388	4816
-4991	0.022	31836	10756	61409	5.34
-4717	0.021	35431	11.35	69356	6031
-4445	0.021	34568	11369	82507	7175
-4174	0.021	33949	10108	88782	7.72
-3906	0.021	36006	10998	95766	8328
-3634	0.021	38447	9895	103648	9013
-3363	0.021	37709	10453	114229	9934
-3091	0.021	34934	10253	115981	10086
-2.82	0.021	33852	10156	123194	10713
-2548	0.021	35.74	9471	129107	11227
-2277	0.021	37505	9842	129991	11304
-2005	0.021	37483	9.45	127292	11069
-1734	0.021	38686	10135	131965	11476
-1462	0.021	38871	10069	128.08	11138
-1191	0.021	39395	9648	128488	11174
-0.919	0.021	39671	10771	125075	10877
-0.648	0.021	38782	9718	119.26	10371
-0.376	0.021	40967	9038	113998	9913
-0.105	0.021	38.82	10124	105242	9152
0.167	0.021	41104	9923	109066	9485
0.438	0.021	45517	9806	91055	7918
0.71	0.021	41928	10.72	76705	6.67
0.983	0.021	44878	10629	67.19	5843
1254	0.021	47269	9.16	59499	5174
1527	0.022	44457	10208	48109	4183
1803	0.023	45624	11559	40384	3512
2077	0.023	54061	12509	31721	2758
2349	0.022	53686	13963	25235	2194
2617	0.023	44374	17089	16474	1433
2887	0.024	52471	14859	8042	0.701
3152	0.028	64625	18722	11.42	0.994
rvs167
t (s)	t.err (s)	x (nm)	x.err (nm)	n (molecule)	n.err (molecule)
-3344	0.105	41408	11714	13613	1724
-3239	0.105	34086	8356	6482	0.924
-3135	0.105	39.17	11052	9378	1237
-3.03	0.105	37233	9396	12152	1552
-2926	0.105	35908	7226	15381	1928
-2822	0.105	29611	11268	14811	1861
-2717	0.105	30794	8891	18062	2248
-2613	0.105	34587	6948	22006	2722
-2508	0.105	35791	8675	26704	3292
-2403	0.105	35.46	6668	31306	3853
-2299	0.105	33295	6.59	33707	4145
-2195	0.105	37212	6473	37682	4632
-2.09	0.105	35877	6004	44542	5472
-1985	0.105	39558	5349	48.61	5.97
-1881	0.105	37426	6026	51871	6371
-1776	0.105	38538	6178	56215	6904
-1672	0.105	37085	6359	56368	6922
-1567	0.105	39931	6236	64359	7904
-1463	0.105	41753	5709	68069	8.36
-1358	0.105	39277	5347	73117	8.98
-1254	0.105	41178	5.42	79822	9804
-1149	0.105	37977	5315	81875	10056
-1045	0.105	40663	5387	85941	10556
-0.941	0.105	42297	5562	91959	11296
-0.836	0.105	39433	5081	96215	11.82
-0.732	0.105	45863	5056	99787	12259
-0.627	0.105	42906	4721	107016	13148
-0.522	0.105	42562	5342	110483	13574
-0.418	0.105	43.58	4624	114175	14029
-0.313	0.105	45992	4995	116278	14287
-0.209	0.105	46445	5102	121459	14925
-0.104	0.105	50343	5.59	123035	15119
0	0.105	51774	6274	124599	15311
0.104	0.105	55559	6574	122913	15104
0.209	0.105	62929	7291	116442	14308
0.314	0.105	77749	8837	108589	13342
0.418	0.105	93447	9	95517	11734
0.523	0.105	106571	7.9	81911	10061
0.627	0.105	125.37	7662	59485	7305
0.732	0.105	132908	7046	54609	6707
0.836	0.105	136831	7639	45988	5649
0.941	0.105	148909	7448	39639	4871
1045	0.105	149394	8996	37692	4633
1149	0.105	155.7	9731	33899	4169
1254	0.105	152731	7643	32773	4031
1358	0.105	158531	7954	24.4	3012
1463	0.105	165183	9058	23157	2861
1568	0.105	165041	11668	21242	2629
1672	0.105	166.82	11784	14433	1813
1777	0.105	165.4	11802	17005	2121
1881	0.105	168.95	11391	12417	1.58
1986	0.105	169689	11136	15205	1908
2.09	0.105	166624	12118	10.48	1354
2195	0.105	171439	13534	10158	1319
2299	0.105	174711	14486	13863	1751
2404	0.105	172775	17.22	12219	1556
2508	0.105	175639	21645	3342	0.641
2613	0.105	183.93	23725	5813	0.863
2717	0.105	196649	17514	7.73	1064
2822	0.105	185208	30.2	0	0.546
sla1
t (s)	t.err (s)	x (nm)	x.err (nm)	n (molecule)	n.err (molecule)
-18349	0.494	25891	11619	4.97	0.741
-18245	0.494	24431	12828	2853	0.634
-18.14	0.494	16.54	13497	6214	0.824
-18036	0.494	20514	11367	2901	0.638
-17931	0.494	17114	11.83	9677	1076
-17827	0.494	18816	10848	7967	0.94
-17722	0.494	18499	11593	10341	1133
-17618	0.494	15741	11283	9435	1.07
-17513	0.494	14549	11.32	7265	0.897
-17409	0.494	13873	11551	11542	1.23
-17304	0.494	18362	11416	11332	1.21
-17.2	0.494	19.7	11.87	10679	1152
-17095	0.494	19244	11322	14136	1447
-16991	0.494	15092	11047	13835	1417
-16886	0.494	17203	10792	14656	1488
-16782	0.494	14929	11051	11305	1201
-16677	0.494	22602	10.61	11025	1183
-16573	0.494	12.57	10729	14762	1498
-16468	0.494	14819	10342	9.48	1058
-16364	0.494	15.41	11064	16628	1663
-16259	0.494	18734	10647	12615	1313
-16155	0.494	11689	10422	12556	1.31
-16.05	0.494	13854	10714	17718	1762
-15946	0.494	16831	10851	18769	1854
-15841	0.494	15727	10896	17551	1746
-15737	0.494	15846	10781	9756	1076
-15632	0.494	18156	10897	16352	1639
-15528	0.494	15877	10646	15.09	1526
-15423	0.494	17311	10754	12939	1341
-15319	0.494	16372	10934	18.75	1852
-15214	0.494	14411	10762	16926	1688
-15.11	0.494	16773	11399	15.26	1543
-15005	0.494	14713	10809	18075	1792
-14901	0.494	13401	10.72	20457	2006
-14796	0.494	12669	10639	21742	2126
-14692	0.494	14142	10564	22048	2151
-14587	0.494	13372	10.57	22327	2179
-14483	0.494	14306	10559	20874	2043
-14378	0.494	18509	10246	21753	2126
-14274	0.494	15843	10405	23704	2304
-14169	0.494	14537	10.4	22939	2231
-14065	0.494	13313	10669	24024	2333
-13.96	0.494	14564	10743	21738	2121
-13856	0.494	18429	10735	24782	2.4
-13751	0.494	17619	10659	28115	2709
-13647	0.494	16983	10481	25147	2436
-13542	0.494	13089	10685	24176	2345
-13438	0.494	17865	10173	26.44	2553
-13333	0.494	17098	10483	28245	2721
-13229	0.494	14514	10479	29287	2817
-13124	0.494	12889	10453	32441	3111
-13.02	0.494	19186	10513	32853	3149
-12915	0.494	16221	10711	31	2977
-12811	0.494	15803	10329	34.45	3298
-12706	0.494	20074	10443	31599	3032
-12602	0.494	18512	10.72	33063	3169
-12497	0.494	18022	10107	35358	3382
-12393	0.494	17763	10243	38564	3683
-12288	0.494	18681	10412	38901	3714
-12184	0.494	20756	10338	38551	3682
-12079	0.494	18214	10255	40242	3.84
-11975	0.494	17879	10111	38568	3683
-11.87	0.494	17094	10.24	43267	4124
-11766	0.494	19192	10425	43157	4113
-11661	0.494	17182	10259	44016	4194
-11557	0.494	18002	10256	44.03	4195
-11452	0.494	18218	10149	42501	4051
-11348	0.494	16288	10109	47032	4477
-11243	0.494	18214	10344	44764	4264
-11139	0.494	16705	10.08	48758	4639
-11034	0.494	14824	10138	44997	4285
-10.93	0.494	16168	10.35	50323	4787
-10825	0.494	16902	10106	49159	4677
-10721	0.494	14862	10266	48.68	4632
-10616	0.494	16789	10219	45854	4366
-10512	0.494	14906	10161	50408	4794
-10407	0.494	15767	10.2	48944	4657
-10303	0.494	15388	10464	51562	4903
-10198	0.494	17207	10099	51796	4925
-10094	0.494	16741	10482	55205	5246
-9989	0.494	16319	10147	57365	5.45
-9885	0.494	17133	10058	56104	5331
-9.78	0.494	17356	10.03	54469	5177
-9676	0.494	16972	10137	56.11	5331
-9571	0.494	14837	10412	53.86	5119
-9467	0.494	16881	10206	57119	5426
-9362	0.494	16055	10394	58294	5537
-9258	0.494	17.06	10338	58074	5517
-9153	0.494	14405	10221	62188	5905
-9049	0.494	15784	10425	61201	5811
-8944	0.494	16941	10386	60	5698
-8.84	0.494	16.84	10442	62259	5911
-8735	0.494	18972	10754	63422	6021
-8631	0.494	17874	10494	66056	6.27
-8526	0.494	17019	10491	63624	6.04
-8422	0.494	15.72	10382	65.55	6222
-8317	0.494	15265	10585	66.05	6269
-8213	0.494	18.22	10544	63611	6039
-8108	0.494	14465	10717	68451	6496
-8004	0.494	17575	10518	69225	6569
-7899	0.494	18768	10634	68429	6494
-7795	0.494	15323	10526	68875	6536
-7.69	0.494	16183	10544	70618	6.7
-7586	0.494	16.09	10.33	68614	6511
-7481	0.494	14748	10776	72269	6856
-7377	0.494	16024	10656	70768	6714
-7272	0.494	17207	10491	72992	6924
-7168	0.494	18912	10568	74694	7085
-7063	0.494	19.56	10551	72512	6879
-6959	0.494	19.54	10648	74214	7.04
-6854	0.494	19612	10625	75296	7142
-6.75	0.494	17862	10546	74.88	7103
-6645	0.494	20183	10596	70814	6719
-6541	0.494	17902	10635	71058	6742
-6436	0.494	19.16	10518	72918	6917
-6332	0.494	18542	10.68	75311	7144
-6227	0.494	19983	10499	78006	7398
-6123	0.494	19489	10455	81369	7716
-6018	0.494	20384	10313	80978	7679
-5914	0.494	19028	10.48	79114	7503
-5809	0.494	21803	10512	75954	7204
-5705	0.494	21237	10225	77903	7388
-5.6	0.494	20523	10315	80834	7665
-5496	0.494	19.97	10179	80169	7603
-5391	0.494	21987	10215	79247	7516
-5287	0.494	22593	10256	78467	7442
-5182	0.494	22755	10129	83038	7874
-5078	0.494	22142	10262	87829	8327
-4973	0.494	26662	10322	85065	8065
-4869	0.494	25889	10042	85021	8061
-4764	0.494	28371	10384	83471	7915
-4.66	0.494	26708	10377	83442	7912
-4555	0.494	28417	10276	86406	8192
-4451	0.494	31462	10392	86759	8226
-4346	0.494	31259	10336	82451	7818
-4242	0.494	34.72	10527	83854	7951
-4137	0.494	32724	10567	90572	8586
-4033	0.494	33614	10561	85323	8.09
-3928	0.494	36891	10.8	86189	8172
-3824	0.494	37327	10653	82934	7864
-3719	0.494	40125	10.84	78963	7489
-3615	0.494	38948	10983	84656	8027
-3.51	0.494	41544	11189	82202	7795
-3406	0.494	42831	10825	82885	7859
-3301	0.494	45.03	10728	82919	7863
-3197	0.494	46174	10755	86514	8202
-3092	0.494	50933	11296	84063	7971
-2988	0.494	53648	11073	86411	8193
-2883	0.494	52.18	10996	84303	7994
-2779	0.494	59656	10731	80403	7625
-2674	0.494	61359	11105	78433	7439
-2.57	0.494	65244	11158	82356	7809
-2465	0.494	66114	11195	77432	7344
-2361	0.494	70828	10873	77.59	7359
-2256	0.494	69426	10801	77129	7316
-2152	0.494	75597	10761	79543	7544
-2047	0.494	81.34	11082	75749	7185
-1943	0.494	80604	10.92	72898	6916
-1838	0.494	83406	10988	73364	6.96
-1734	0.494	88871	11038	74932	7108
-1629	0.494	91121	11356	72372	6866
-1525	0.494	92618	10734	72885	6914
-1.42	0.494	96805	10693	64554	6128
-1316	0.494	100233	10945	67871	6441
-1211	0.494	100375	10833	65876	6253
-1107	0.494	104909	10839	66423	6305
-1002	0.494	106576	10817	62599	5944
-0.898	0.494	107634	10749	65609	6228
-0.793	0.494	113854	10676	61215	5813
-0.689	0.494	110456	10508	56169	5338
-0.584	0.494	113615	10851	58.33	5541
-0.48	0.494	121526	10.53	59.55	5656
-0.375	0.494	121923	10928	56152	5336
-0.271	0.494	126217	11526	52432	4985
-0.166	0.494	131109	11.03	51732	4.92
-0.062	0.494	132435	11606	52035	4948
0.043	0.494	132504	11756	49766	4735
0.147	0.494	136488	11851	48858	4.65
0.252	0.494	137065	11.62	46632	4441
0.356	0.494	141633	11775	42249	4029
0.461	0.494	146.75	12289	45798	4362
0.565	0.494	149681	12119	44183	4.21
0.67	0.494	147513	12359	38.84	3709
0.774	0.494	151.4	12427	37597	3593
0.879	0.494	157278	12394	34815	3333
0.983	0.494	157151	12485	33127	3176
1088	0.494	159481	13533	30519	2933
1192	0.494	164165	13142	29473	2835
1297	0.494	165726	13954	25264	2449
1401	0.494	171471	14168	20743	2034
1506	0.494	170709	14595	22918	2232
1.61	0.494	169047	15.59	17321	1729
1715	0.494	169341	14897	16062	1615
1819	0.494	176081	15057	21553	2.11
1924	0.494	176672	15207	18514	1838
2028	0.494	178242	15473	24355	2371
2133	0.494	181938	15603	17.72	1.77
2237	0.494	186.58	14806	14108	1451
2342	0.494	191512	18313	13704	1424
2446	0.494	196173	16062	13864	1431
2551	0.494	193894	17874	7.43	0.907
2655	0.494	198324	18221	12096	1298
2.76	0.494	199417	19107	4102	0.718
2864	0.494	199548	16104	9727	1109
2969	0.494	189974	19053	0	0.608
3073	0.494	204145	21351	2233	0.648
sla2
t (s)	t.err (s)	x (nm)	x.err (nm)	n (molecule)	n.err (molecule)
-25.01	0.284	38074	11812	1805	0.684
-24886	0.284	28705	11812	0	0.668
-24762	0.284	34739	9.14	4149	0.777
-24638	0.284	40042	14.48	2.74	0.713
-24514	0.284	34721	8906	4.65	0.799
-24.39	0.284	33038	11149	2919	0.703
-24266	0.284	33263	8157	1028	0.643
-24142	0.284	37029	8587	0.793	0.652
-24018	0.284	35702	8742	2075	0.664
-23894	0.284	28886	7.12	0.528	0.645
-23.77	0.284	33372	9787	3575	0.725
-23646	0.284	34707	8201	5378	0.809
-23522	0.284	28349	7403	5989	0.867
-23398	0.284	32289	8453	2476	0.671
-23274	0.284	29575	9177	6839	0.902
-23.15	0.284	42904	10675	5021	0.788
-23026	0.284	26615	9592	3324	0.705
-22902	0.284	29045	9471	4321	0.751
-22778	0.284	27488	7801	5212	0.802
-22654	0.284	29996	8651	6889	0.906
-22.53	0.284	34895	10	5.31	0.801
-22406	0.284	35146	10615	3.93	0.727
-22282	0.284	31707	9941	5379	0.801
-22158	0.284	33711	8842	7112	0.919
-22034	0.284	33708	8247	9653	1101
-21.91	0.284	33354	8971	13496	1409
-21786	0.284	30645	10795	8552	1011
-21662	0.284	33196	8027	7119	0.91
-21538	0.284	35319	8121	9.65	1093
-21414	0.284	30603	9104	9683	1098
-21.29	0.284	28.54	7871	10591	1167
-21166	0.284	35082	10203	11635	1.25
-21042	0.284	29444	9181	10653	1174
-20918	0.284	26265	9549	13143	1378
-20794	0.284	32399	8299	11001	1208
-20.67	0.284	26975	8425	7623	0.946
-20546	0.284	27943	8.48	8823	1031
-20422	0.284	29069	8119	8893	1043
-20298	0.284	32564	8052	8463	1012
-20174	0.284	27358	7481	11372	1238
-20.05	0.284	31286	8595	10.19	1145
-19926	0.284	25265	8898	10027	1124
-19802	0.284	24141	8595	11035	1217
-19678	0.284	32379	8.92	11.4	1236
-19554	0.284	28312	8021	8819	1035
-19.43	0.284	26453	8.8	8814	1028
-19306	0.284	25063	7565	13842	1438
-19182	0.284	31616	8877	13052	1374
-19058	0.284	29267	8315	13877	1443
-18934	0.284	30632	8134	15245	1.56
-18.81	0.284	31875	7431	15113	1549
-18686	0.284	29705	8374	14.61	1506
-18562	0.284	30295	7517	16.41	1656
-18438	0.284	29994	8409	16.14	1636
-18314	0.284	28989	7701	16216	1648
-18.19	0.284	28721	8326	17243	1.73
-18066	0.284	34103	9789	18105	1.81
-17942	0.284	28711	8363	16649	1681
-17818	0.284	28748	7789	14695	1512
-17694	0.284	32405	7488	15605	1588
-17.57	0.284	29643	7868	17144	1727
-17446	0.284	28781	7541	15482	1584
-17322	0.284	28789	8.24	18045	1809
-17198	0.284	28225	8.03	17439	1.75
-17074	0.284	33685	7911	18.57	1853
-16.95	0.284	31046	7529	20538	2028
-16826	0.284	31428	6936	21312	2097
-16702	0.284	32959	7.9	19641	1951
-16578	0.284	29342	7731	19601	1948
-16454	0.284	34205	6911	18043	1804
-16.33	0.284	27383	7734	16755	1694
-16206	0.284	31986	7926	17233	1736
-16082	0.284	30944	7411	20019	1981
-15958	0.284	32573	7885	22.1	2166
-15834	0.284	30777	6855	20.4	2015
-15.71	0.284	34318	7351	19908	1971
-15586	0.284	31.4	7434	20581	2032
-15462	0.284	31622	6925	20986	2066
-15338	0.284	31387	6753	21956	2153
-15214	0.284	30579	6529	19.21	1906
-15.09	0.284	29245	6822	21.77	2136
-14966	0.284	28792	7873	21731	2134
-14842	0.284	28534	6624	23488	2294
-14718	0.284	29038	6718	23084	2253
-14594	0.284	28212	6538	22275	2181
-14.47	0.284	29.76	6174	21404	2104
-14346	0.284	30.41	6494	24043	2343
-14222	0.284	29446	7327	25254	2453
-14098	0.284	28.11	7053	23805	2321
-13974	0.284	27437	6777	25694	2493
-13.85	0.284	29593	7393	24224	2358
-13726	0.284	29.66	6406	26254	2544
-13602	0.284	30503	6769	25825	2507
-13478	0.284	29921	6945	27955	2701
-13354	0.284	32128	6662	29341	2829
-13.23	0.284	32.18	6188	31094	2992
-13106	0.284	30577	6207	30898	2971
-12982	0.284	32087	6106	28866	2784
-12858	0.284	29387	6495	27668	2674
-12734	0.284	28723	6.45	27705	2677
-12.61	0.284	32821	6616	29435	2836
-12486	0.284	28699	5697	29115	2808
-12362	0.284	32.95	6071	29371	2832
-12238	0.284	32226	6516	29248	2822
-12114	0.284	29755	6133	26964	2.61
-11.99	0.284	29597	6243	29.38	2831
-11866	0.284	29988	5.89	28297	2731
-11742	0.284	29495	6153	30204	2907
-11618	0.284	33288	6882	28651	2764
-11494	0.284	32961	6245	29.6	2852
-11.37	0.284	29692	6162	27955	2702
-11246	0.284	29613	6043	28144	2719
-11122	0.284	31237	6228	28364	2738
-10998	0.284	31813	6105	30124	2.9
-10874	0.284	33067	5832	30161	2903
-10.75	0.284	33322	6132	29058	2.8
-10626	0.284	34522	6496	28751	2773
-10502	0.284	29818	6536	25379	2463
-10378	0.284	33774	5845	27995	2703
-10254	0.284	29749	6159	28819	2779
-10.13	0.284	32363	6988	29567	2849
-10006	0.284	33728	6271	29376	2832
-9882	0.284	31.99	5.92	32425	3115
-9758	0.284	33625	6533	30547	2.94
-9634	0.284	33594	6104	29551	2849
-9.51	0.284	35302	6138	31756	3053
-9386	0.284	33784	6317	31406	3019
-9262	0.284	31134	5925	30397	2926
-9138	0.284	33342	6651	32145	3088
-9014	0.284	33905	5828	32391	3.11
-8.89	0.284	31201	6115	30116	2.9
-8766	0.284	31683	6309	29674	2858
-8642	0.284	31618	5905	29066	2802
-8518	0.284	30717	6252	29895	2878
-8394	0.284	33.49	6433	29325	2826
-8.27	0.284	30663	6288	30324	2918
-8146	0.284	32327	6711	31722	3048
-8022	0.284	32021	6372	33.41	3205
-7898	0.284	31747	6431	32353	3107
-7774	0.284	33712	6118	30819	2964
-7.65	0.284	30075	7044	33.86	3246
-7526	0.284	31415	6356	30631	2946
-7402	0.284	32662	6.63	32484	3118
-7278	0.284	34004	6548	32515	3121
-7154	0.284	33096	6904	33865	3246
-7.03	0.284	33691	6831	33964	3256
-6906	0.284	32993	6.61	34233	3281
-6782	0.284	36379	6294	35179	3369
-6658	0.284	36.73	6826	35709	3418
-6534	0.284	34983	7056	36742	3514
-6.41	0.284	35525	6657	36077	3453
-6286	0.284	39.24	6544	35402	3389
-6162	0.284	39862	6.87	34463	3302
-6038	0.284	41573	7013	33.29	3193
-5914	0.284	39306	7181	33782	3239
-5.79	0.284	36732	7353	35412	3.39
-5666	0.284	42171	7.83	35614	3409
-5542	0.284	42113	7097	34148	3272
-5418	0.284	40119	6.74	33.68	3.23
-5294	0.284	45681	8194	34506	3306
-5.17	0.284	43885	8034	34171	3274
-5046	0.284	43346	7286	35672	3414
-4922	0.284	46392	6995	35362	3385
-4798	0.284	48916	8525	35.42	3391
-4674	0.284	50779	8238	32568	3125
-4.55	0.284	51922	8.73	32734	3141
-4426	0.284	52357	7971	35893	3435
-4302	0.284	54813	7611	36215	3465
-4178	0.284	54037	7135	36105	3454
-4054	0.284	54053	7716	33.15	3.18
-3.93	0.284	58.88	8.23	34999	3351
-3806	0.284	61814	8733	35.11	3362
-3682	0.284	62253	8859	36.62	3503
-3558	0.284	63622	8586	35414	3.39
-3434	0.284	64475	8251	34299	3286
-3.31	0.284	68438	8652	36244	3468
-3186	0.284	69.43	9283	33023	3168
-3062	0.284	74085	8853	31571	3034
-2938	0.284	76.02	8984	33591	3221
-2814	0.284	81236	9719	31159	2996
-2.69	0.284	80063	9254	32096	3082
-2566	0.284	86361	9328	30943	2975
-2442	0.284	87852	9435	29697	2.86
-2318	0.284	91215	10064	29823	2872
-2194	0.284	92004	9801	32543	3124
-2.07	0.284	98572	9765	29135	2809
-1946	0.284	96886	8537	29804	2872
-1822	0.284	102956	8875	28726	2772
-1698	0.284	105511	8962	28423	2744
-1574	0.284	111355	9154	28969	2794
-1.45	0.284	107109	8876	26078	2528
-1326	0.284	111768	9507	26708	2588
-1202	0.284	113246	8862	26979	2611
-1078	0.284	118.26	10187	25495	2476
-0.954	0.284	122393	8738	26167	2537
-0.83	0.284	119316	9.17	27349	2646
-0.706	0.284	124.18	8955	25.05	2435
-0.582	0.284	127788	9382	26045	2526
-0.458	0.284	133213	10126	26936	2607
-0.334	0.284	136951	9575	23.25	2269
-0.21	0.284	138185	10382	24462	2382
-0.086	0.284	143303	10622	25639	2491
0.038	0.284	147888	10166	25819	2506
0.162	0.284	146479	11078	23.41	2286
0.286	0.284	148336	11434	21149	2081
0.41	0.284	153379	11478	24569	2393
0.534	0.284	151823	11263	23.85	2326
0.658	0.284	158803	10498	25944	2519
0.782	0.284	159848	11442	23685	2313
0.906	0.284	167415	12227	21693	2133
1.03	0.284	167617	11411	20724	2047
1154	0.284	168052	12476	22.4	2194
1278	0.284	169075	12622	20541	2029
1402	0.284	173093	13473	22233	2181
1526	0.284	171196	12282	19523	1937
1.65	0.284	175961	13265	22041	2161
1774	0.284	172401	14433	18706	1867
1898	0.284	183822	15185	20598	2035
2022	0.284	182102	16.05	17074	1721
2146	0.284	184981	13.85	15495	1586
2.27	0.284	190177	15087	14946	1.54
2394	0.284	183669	16578	14.99	1543
2518	0.284	194606	16977	16499	1677
2642	0.284	196204	16126	16154	1654
2766	0.284	193.44	14953	16456	1675
2.89	0.284	194471	17684	17148	1735
3014	0.284	190645	18198	16897	1717
3138	0.284	196519	17483	11442	1255
3262	0.284	203807	20774	13629	1453
3386	0.284	200484	19612	16365	1676
3.51	0.284	187535	22515	14432	1517
3634	0.284	205455	21894	11759	1292
3758	0.284	192293	23842	12716	1372
3882	0.284	196255	24571	9228	1117
