# Supplementary figures and images for: Visualizing the functional architecture of the endocytic machinery
Source: eLife journal article supplement (doi:10.7554/elife.04535), 2015-02-12

Figure 1 — figure supplement 4

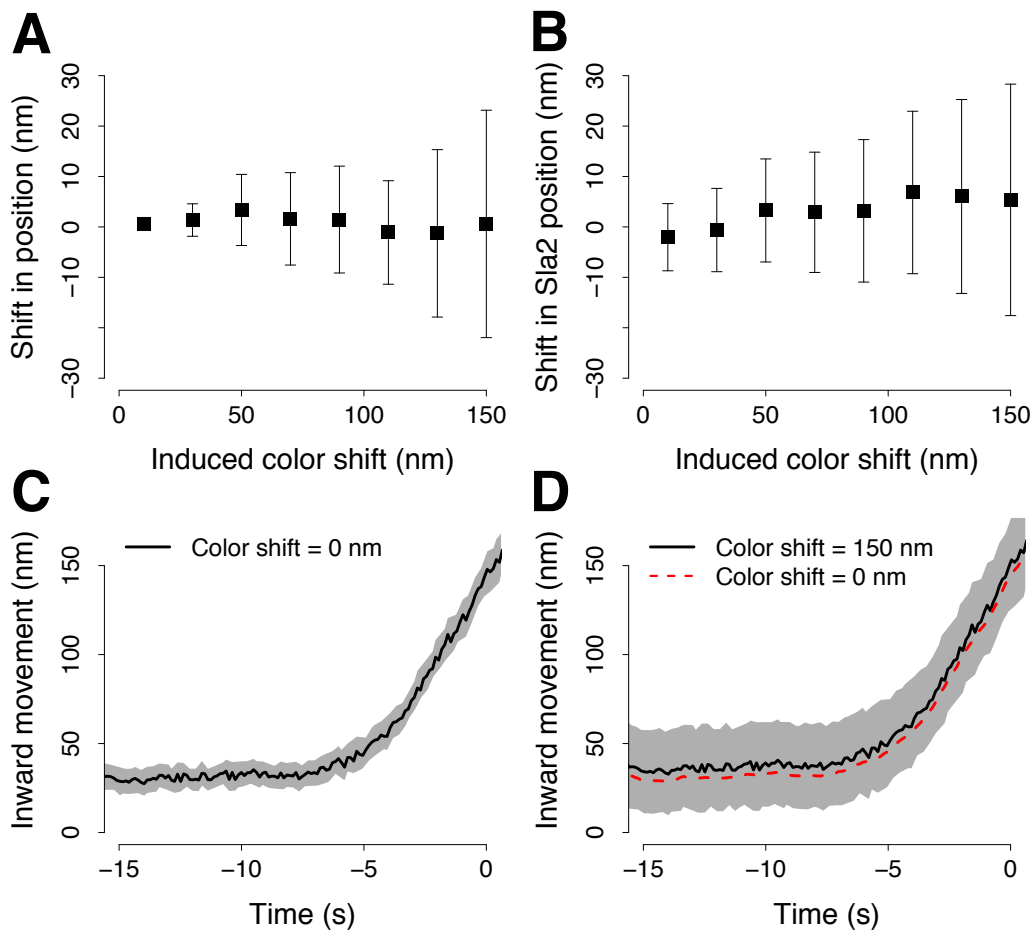

Supplement: supp [file elife-04535-supp-v1.zip]

**Figure 3—figure supplement 1**

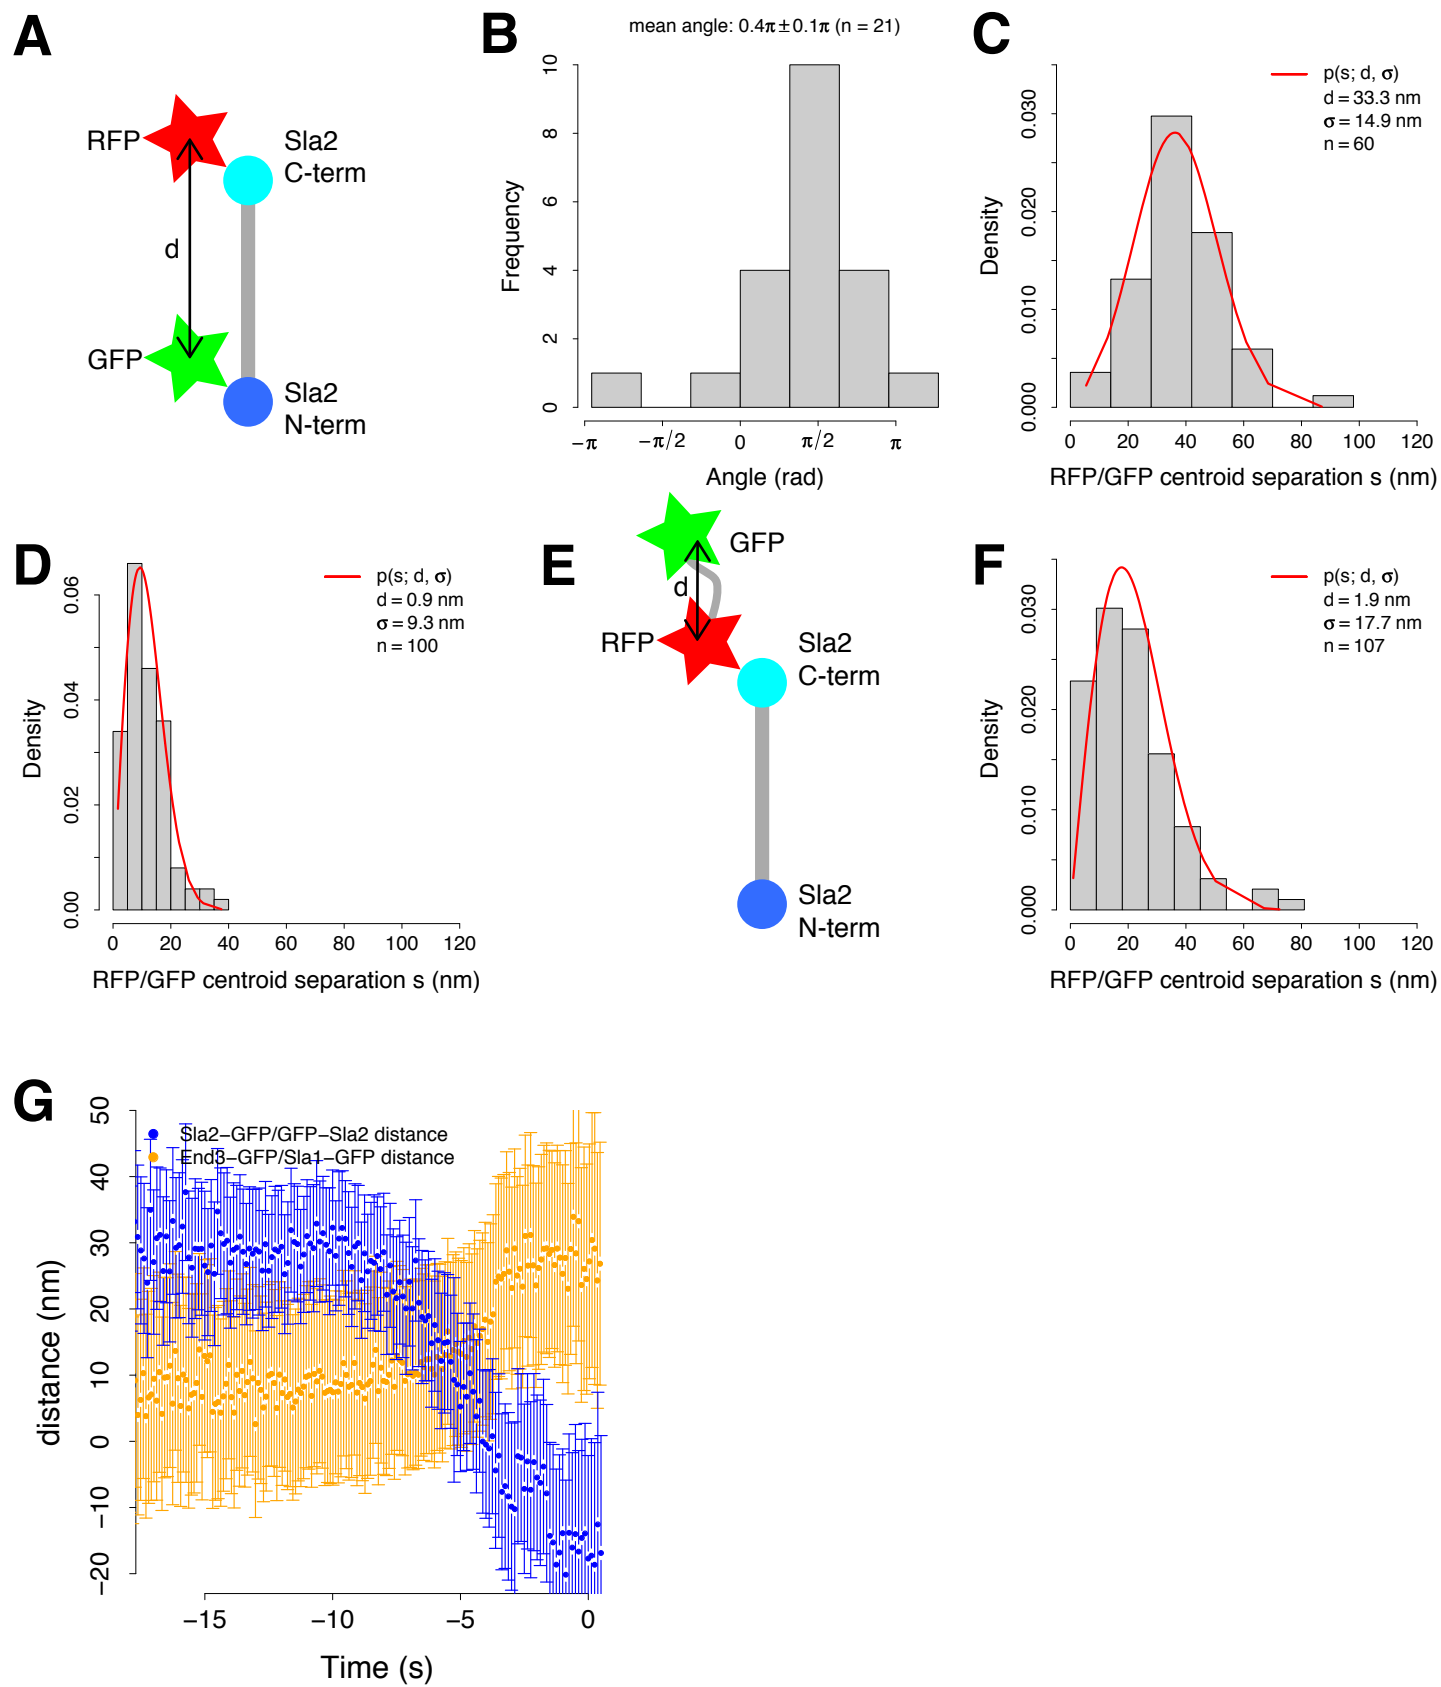

Supplement: supp [file elife-04535-supp-v1.zip]

**Figure 3—figure supplement 2**

**A**

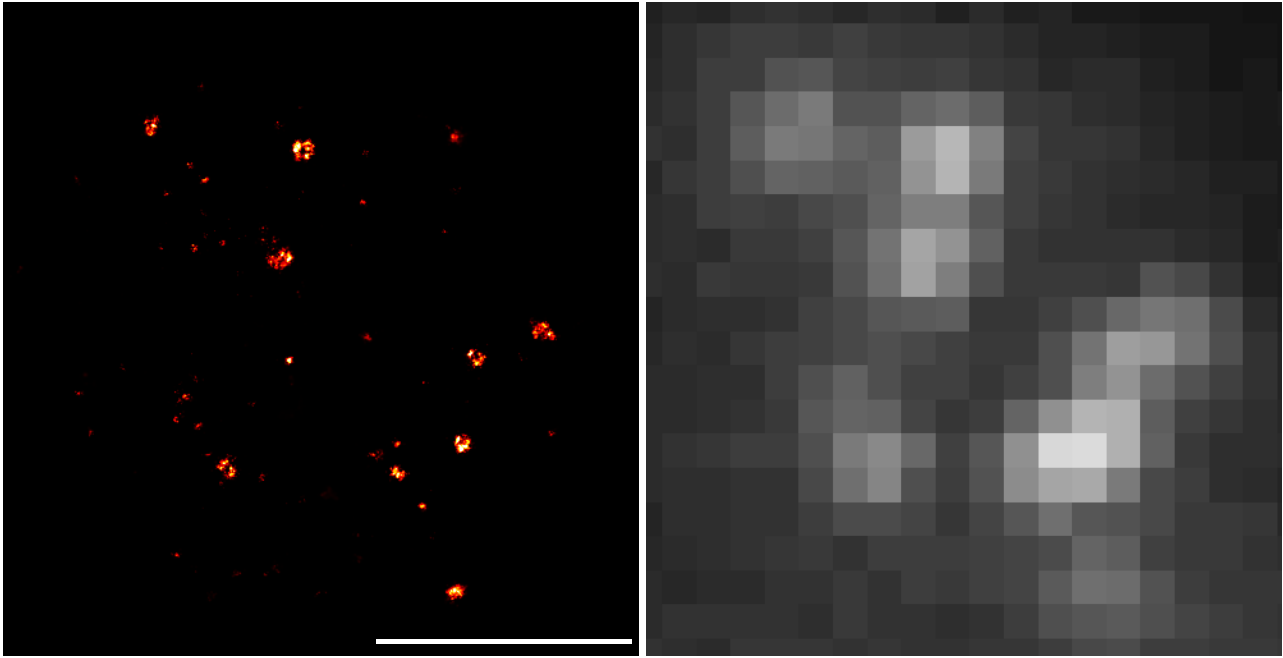

**B**

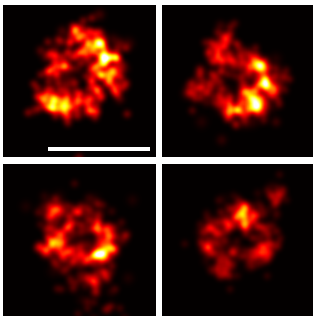

**C**

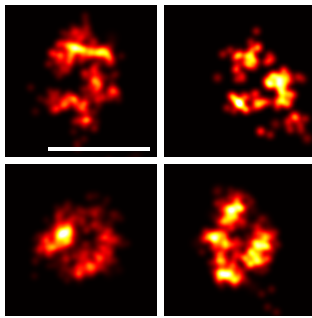

**D**

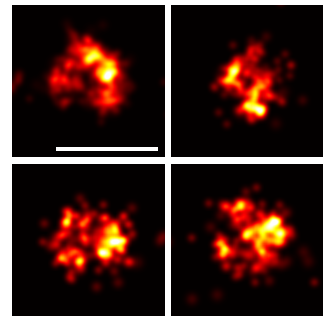

**E**

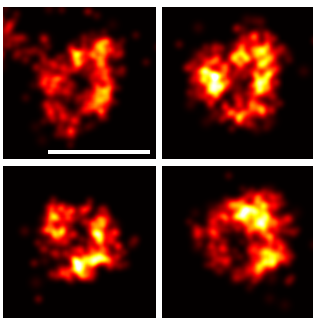

**F**

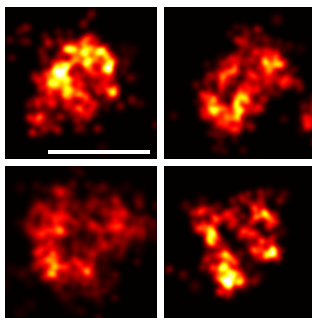

**G**

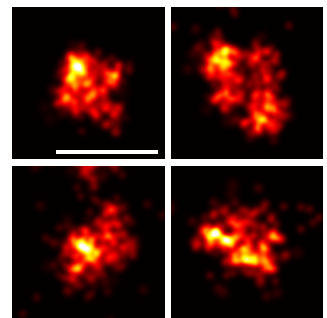

**H**

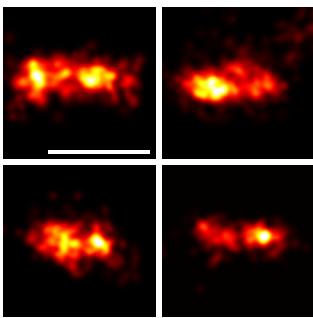

Supplement: supp [file elife-04535-supp-v1.zip]

**Figure 1 — figure supplement 5**

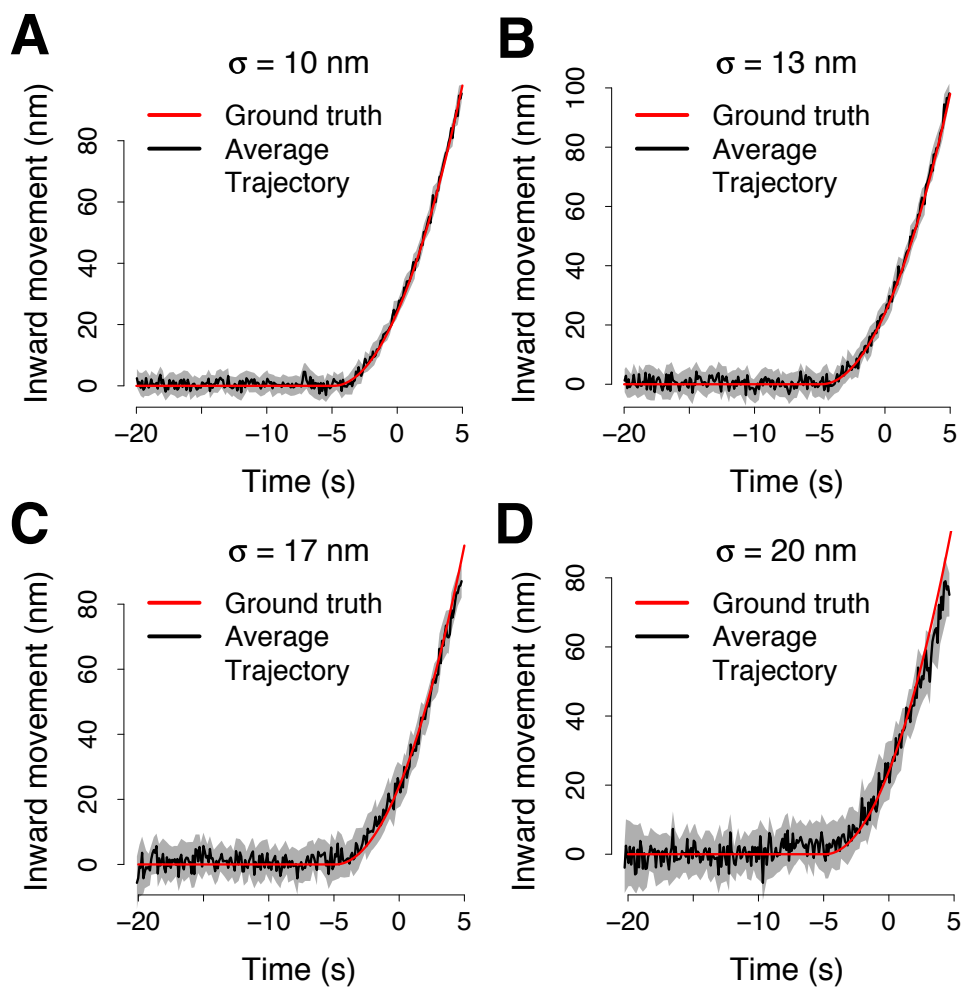

Supplement: supp [file elife-04535-supp-v1.zip]

**Figure 1—figure supplement 3**

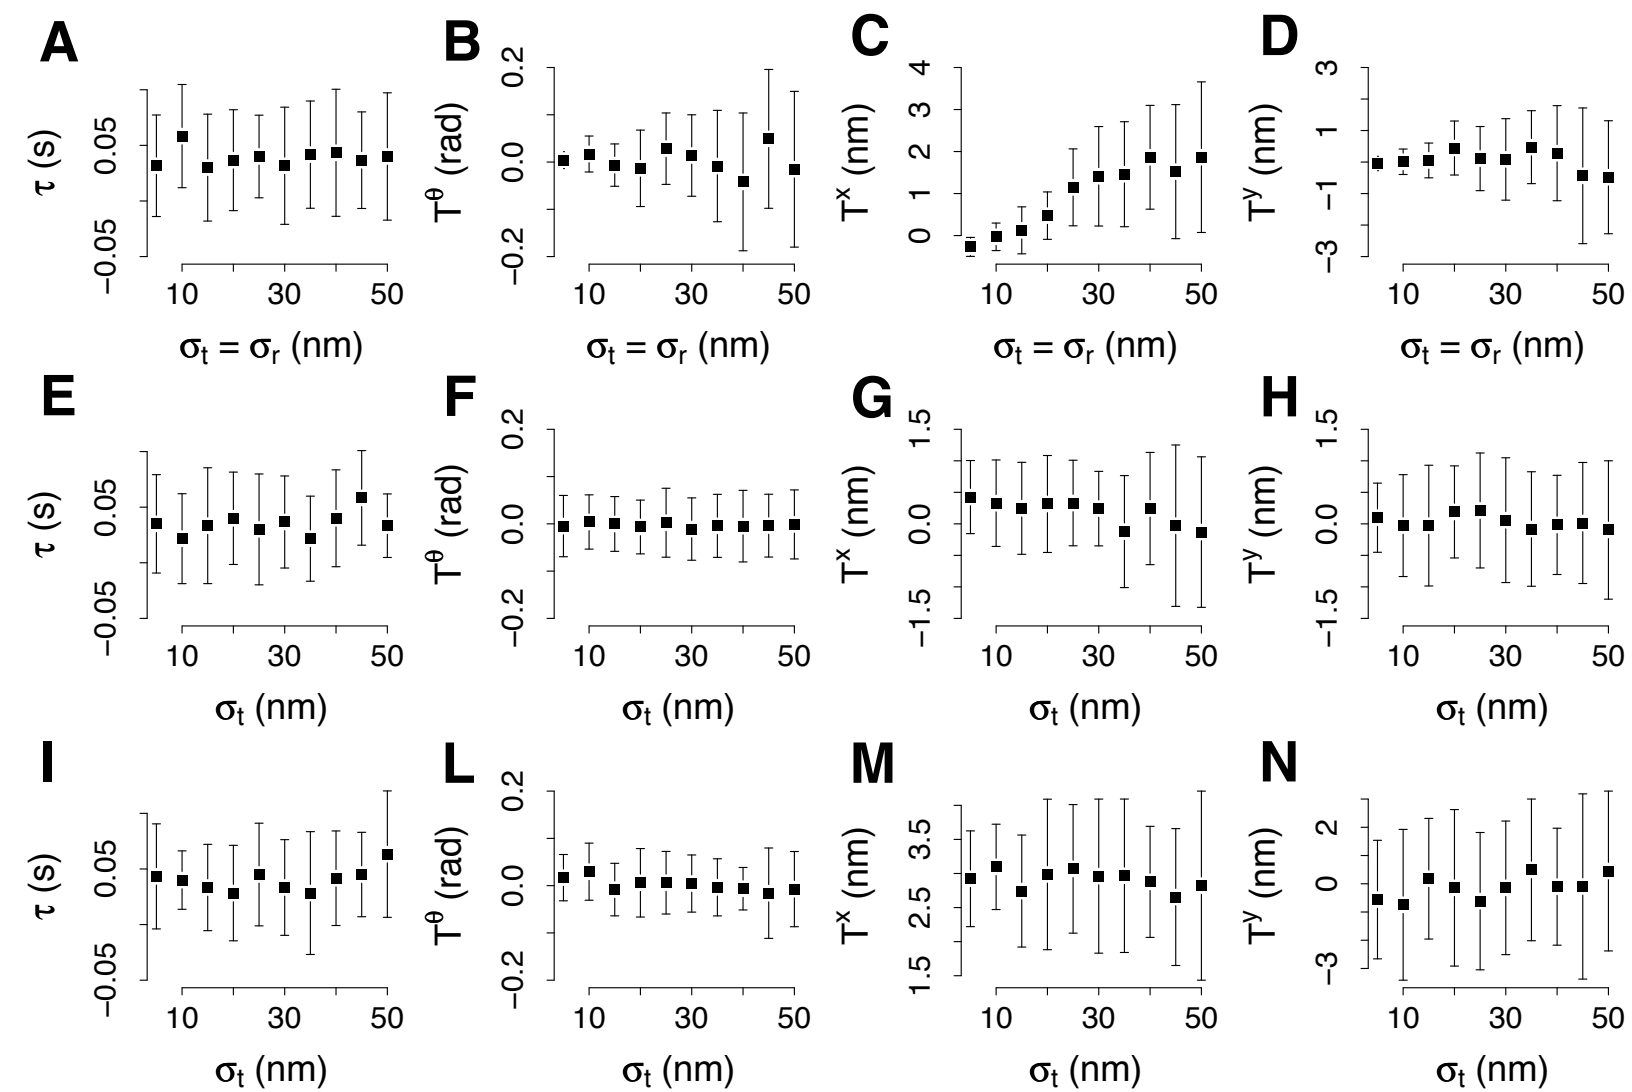

Supplement: supp [file elife-04535-supp-v1.zip]

**Figure 4—figure supplement 1**

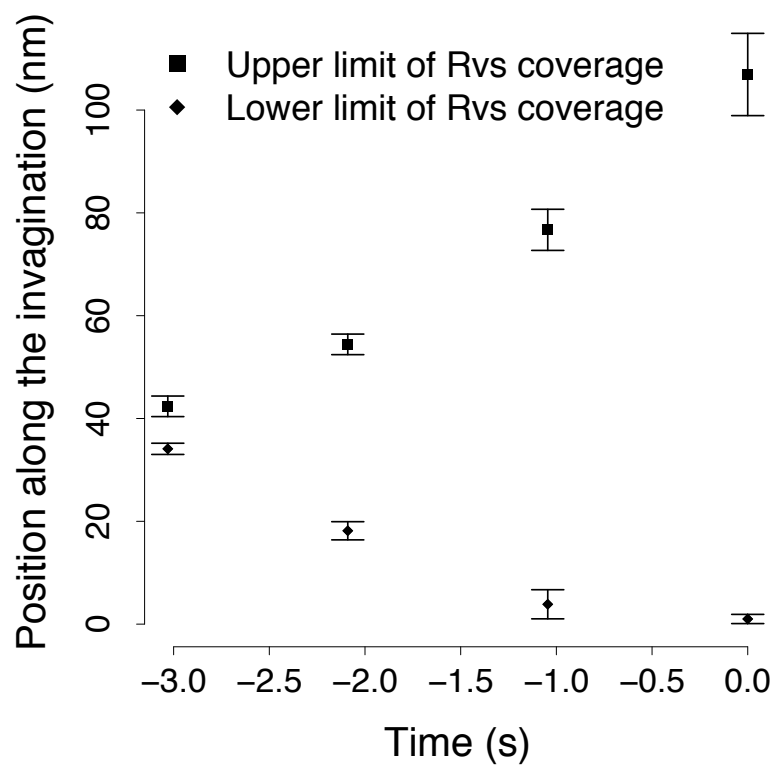

Supplement: supp [file elife-04535-supp-v1.zip]

Figure 6—figure supplement 1

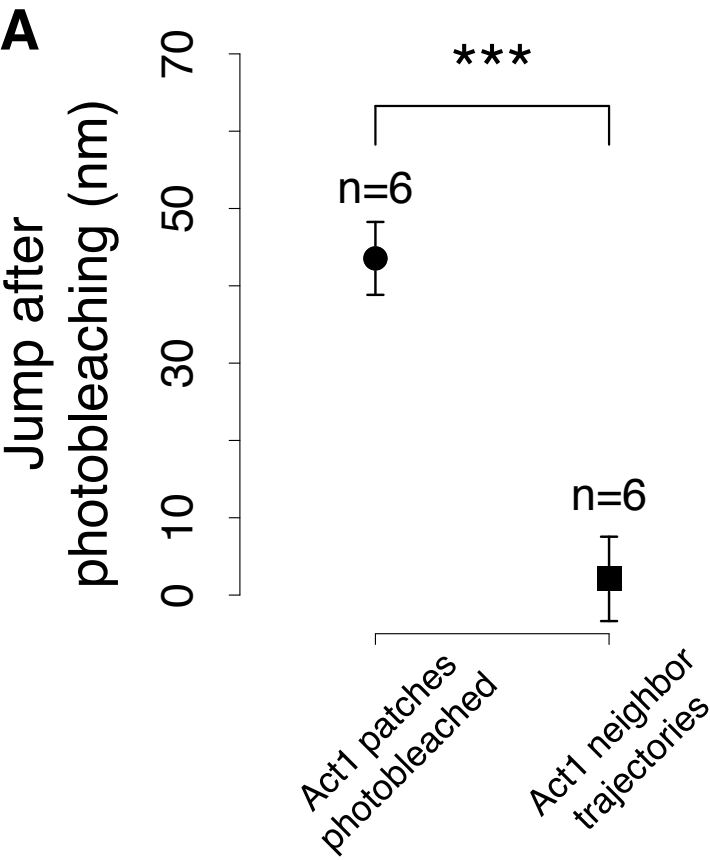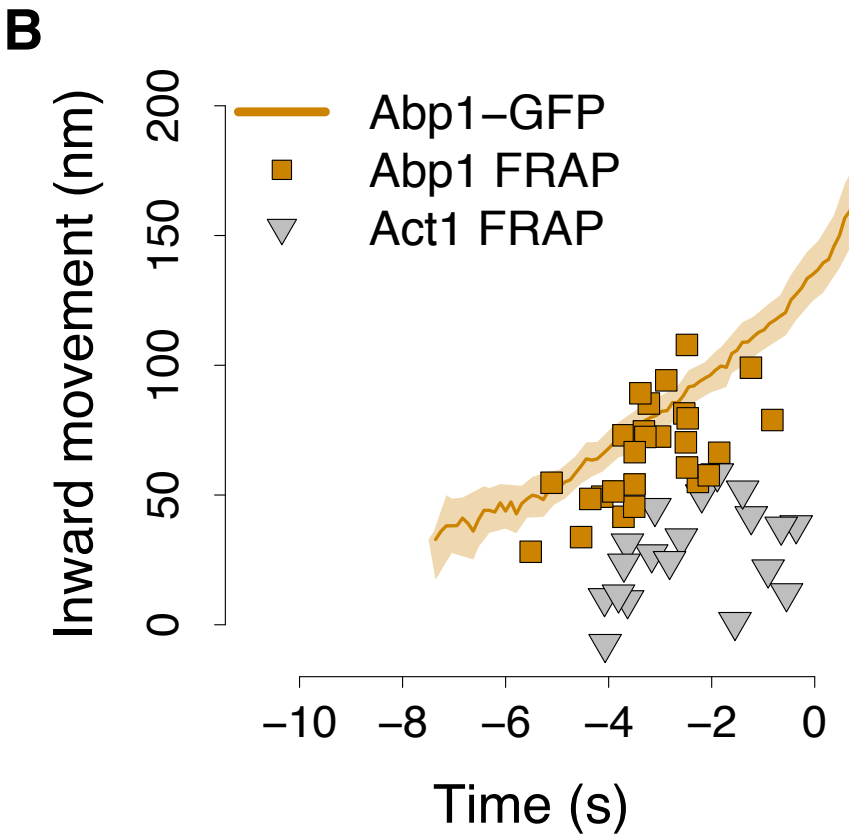

Supplement: supp [file elife-04535-supp-v1.zip]

**Figure 1—figure supplement 2**

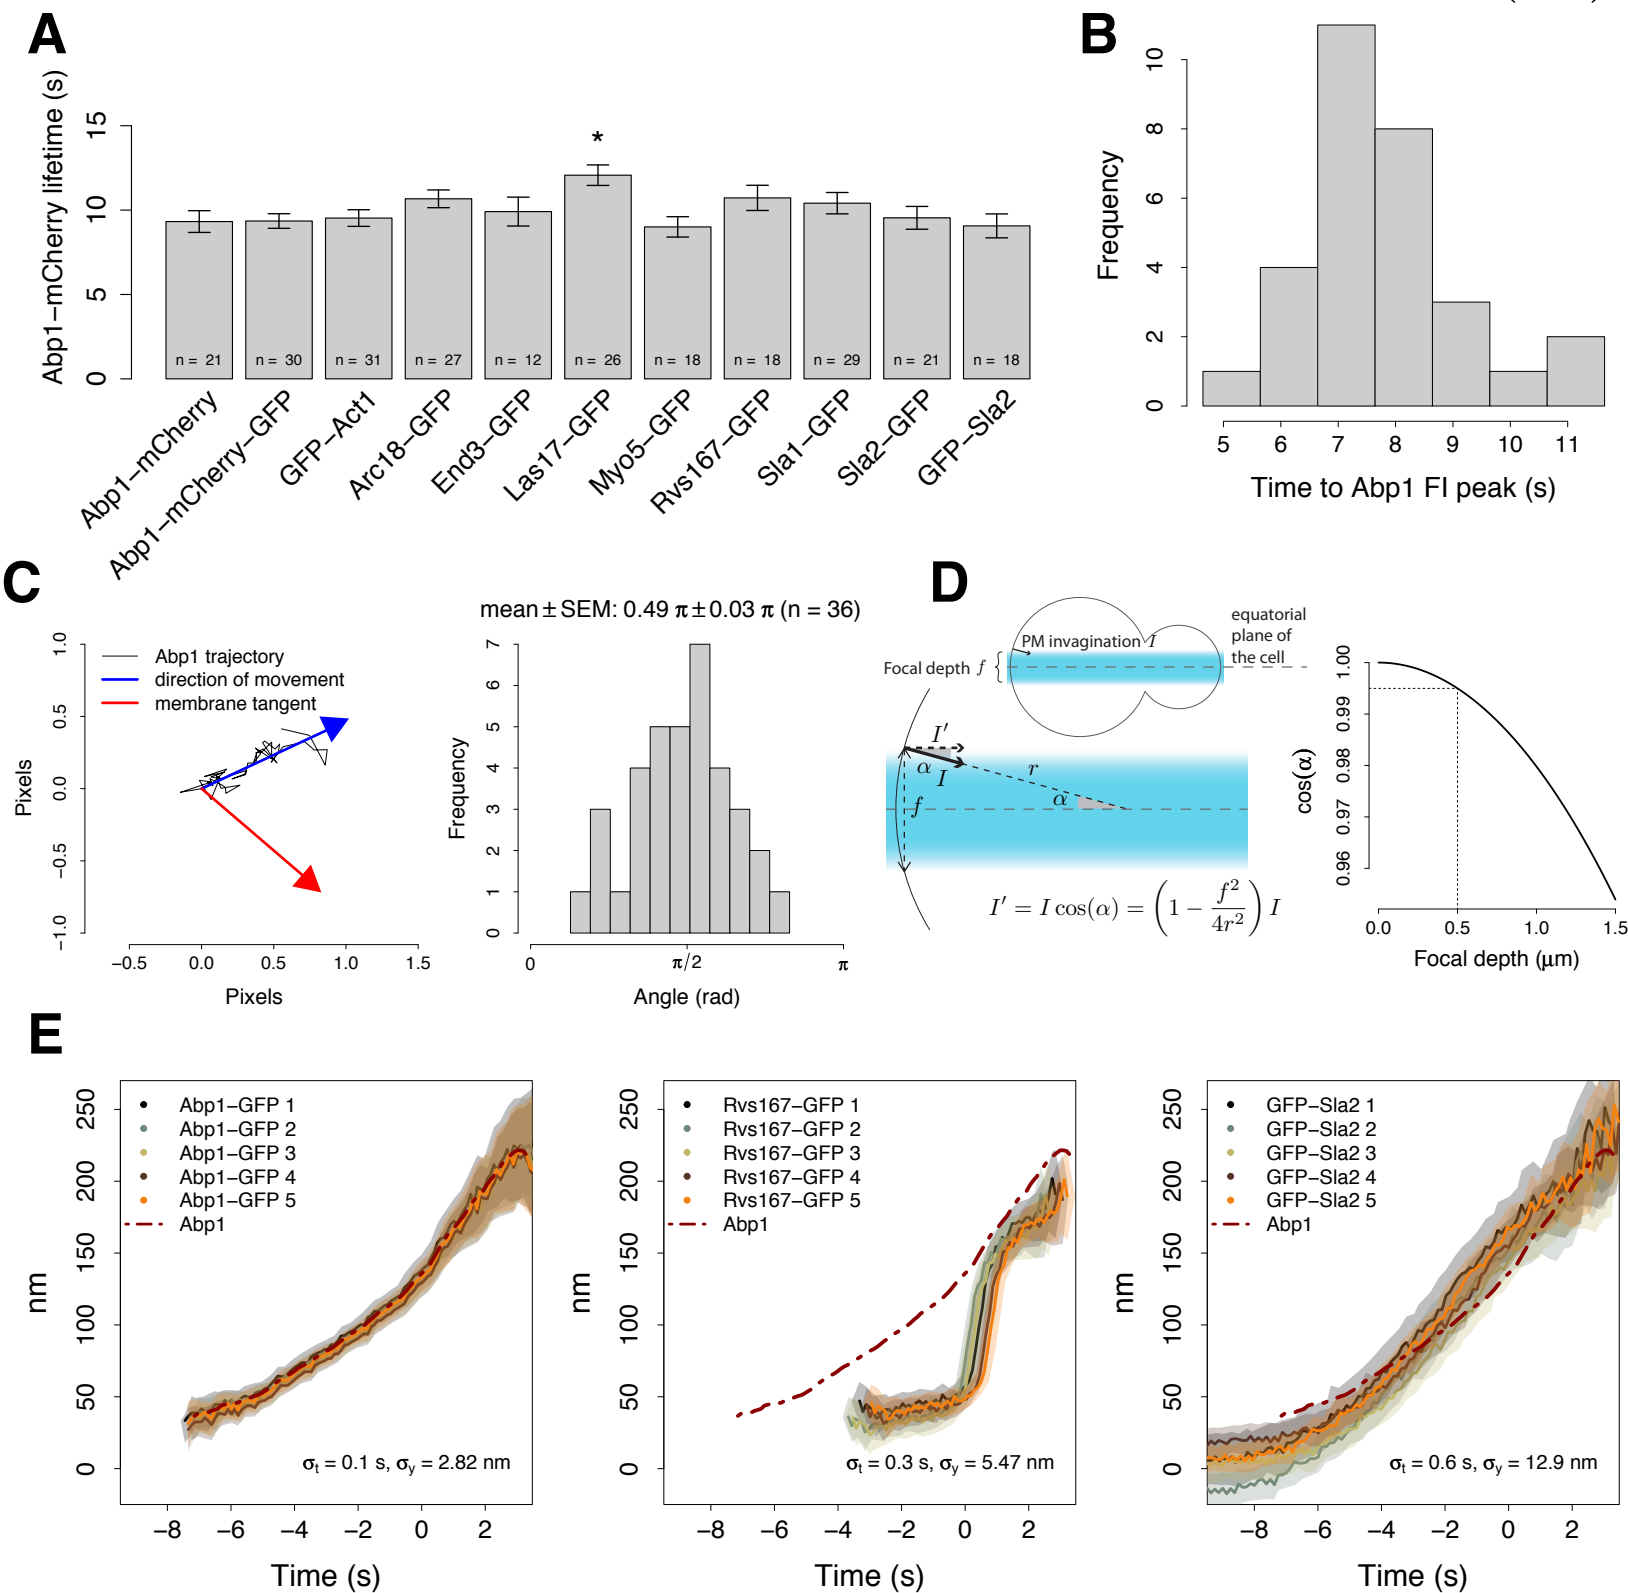

Supplement: supp [file elife-04535-supp-v1.zip]

**Figure 1—figure supplement 1**

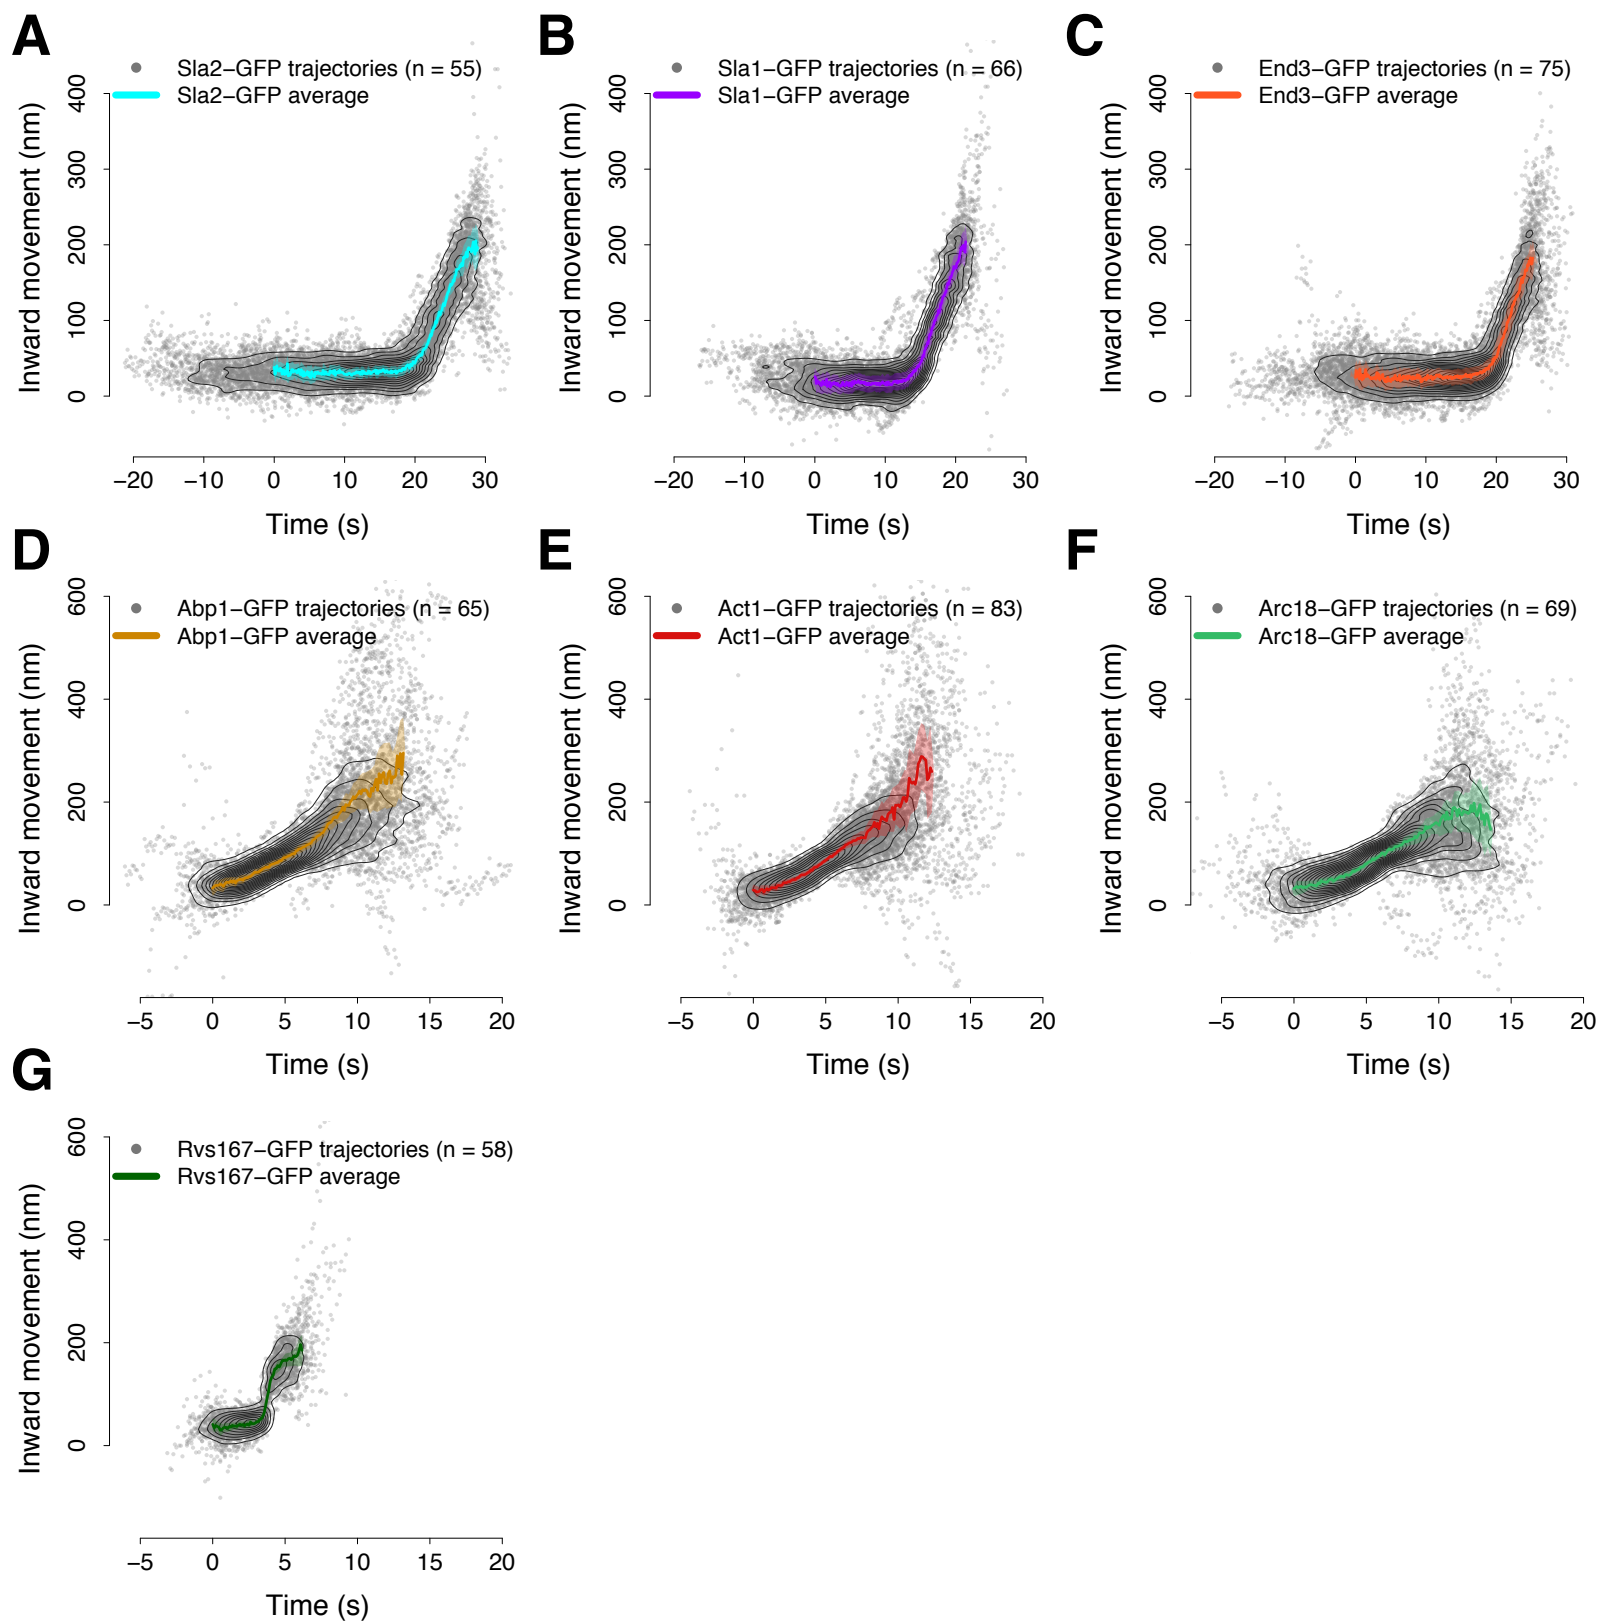

Supplement: supp [file elife-04535-supp-v1.zip]
